1       **STING Promotes Breast Cancer Cell Survival by an Inflammatory-Independent**  
2                   **Nuclear Pathway Enhancing the DNA Damage Response**

3                   Laura Cheradame<sup>1,2</sup>, Ida Chiara Guerrera<sup>3</sup>, Julie Gaston<sup>1,2§</sup>, Alain Schmitt<sup>4</sup>, Vincent Jung<sup>3</sup>,  
4                   Marion Pouillard<sup>1</sup>, Nina Radosevic-Robin<sup>5</sup>, Mauro Modesti<sup>6</sup>, Jean-Gabriel Judde<sup>2</sup>, Stefano Cairo<sup>2#</sup> and  
5                   Vincent Goffin<sup>1,\*\*</sup>

6  
7       Affiliations:

8       <sup>1</sup>Inserm, Unit 1151, Institut Necker Enfants Malades (INEM), Université de Paris, Faculty of Medicine,  
9       75015 Paris, France

10       <sup>2</sup>XenTech, 91000 Evry, France

11       <sup>3</sup>Proteomics Platform 3P5-Necker, Université de Paris - Structure Fédérative de Recherche Necker, INSERM  
12       US24/CNRS UMS3633, 75015 Paris, France

13       <sup>4</sup>Inserm U1016 and CNRS UMR8104, Université de Paris, 75014, Paris, France

14       <sup>5</sup>U1240 INSERM/University Clermont Auvergne, Centre Jean Perrin, Department of Pathology, 63011  
15       Clermont-Ferrand, France

16       <sup>6</sup>Cancer Research Center of Marseille, CNRS UMR7258, Inserm U1068, Institut Paoli-Calmettes, Aix-  
17       Marseille Université, Marseille, 13009, France

18

19       #Equal contribution

20       §Current address: Yubsis, 4 rue Pierre Fontaine 91000 EVRY.

21       \*Correspondence: [vincent.goffin@inserm.fr](mailto:vincent.goffin@inserm.fr)

## 22 Abstract

23 STING (Stimulator of Interferon Genes) is a well-known endoplasmic reticulum-anchored adaptor of the  
24 innate immunity that triggers the expression of inflammatory cytokines in response to pathogen infection.  
25 In cancer cells, this pro-inflammatory pathway can be activated by genomic DNA damage potentiating  
26 antitumor immune responses. Here we report that STING promotes cancer cell survival and resistance to  
27 genotoxic treatment in a cell-autonomous manner. Mechanistically, we show that STING partly localizes  
28 at the inner nuclear membrane in various breast cancer cell lines and clinical tumor samples, and interacts  
29 with several proteins of the DNA damage response (DDR). STING overexpression enhances the amount of  
30 chromatin-bound DNA-dependent Protein Kinase (DNA-PK) complex, while STING silencing impairs DDR  
31 foci formation and DNA repair efficacy. Importantly, this function of STING is independent of its canonical  
32 pro-inflammatory pathway. This study highlights a previously unappreciated cell-autonomous tumor-  
33 promoting mechanism of STING that opposes its well-documented role in tumor immunosurveillance.

34 **Keywords:** STING, nuclear localization, nuclear membrane, DNA damage response, DNA repair, DNA-PK,  
35 chemoresistance, cancer.

## 36 Graphical abstract

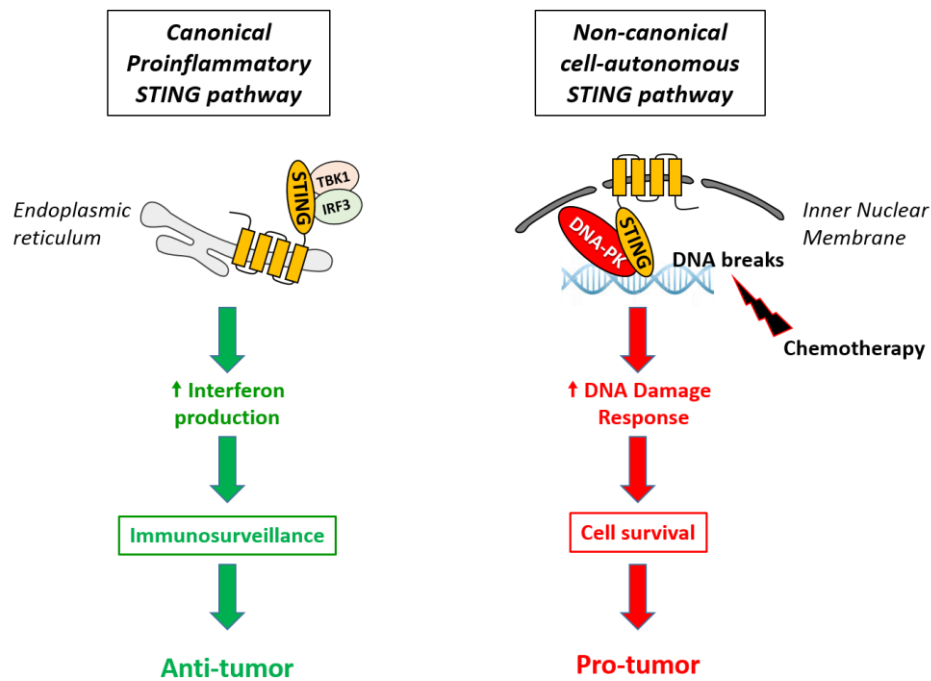

37

## 38 Introduction

39 Stimulator of Interferon Genes (STING) has a well-established adaptor function during the innate immune  
40 response to cytosolic DNA (Ishikawa, Ma, and Barber 2009). This transmembrane protein is mainly  
41 described as an endoplasmic reticulum (ER)-resident protein (Ishikawa and Barber 2008). It is composed  
42 of four N-terminal transmembrane domains and a cytosolic C-terminal tail that contains the cyclic  
43 dinucleotide (CDN)-binding domain and domains of interaction with downstream effectors (Liu et al.  
44 2015). Upon infection, CDNs are directly secreted by pathogens or generated by the cyclic GMP-AMP  
45 synthase (cGAS) in response to cytosolic pathogen-derived DNA (Ablasser et al. 2013). CDNs bind to, and  
46 activate, the adaptor protein STING that recruits TANK-binding kinase 1 (TBK1) and the transcription factor  
47 IRF-3 (interferon [IFN] regulatory factor-3). TBK1 phosphorylates IRF-3, phospho-IRF-3 forms homodimers  
48 that translocate to the nucleus to induce the expression of inflammatory cytokines (Liu et al. 2015).

49 Genome integrity is constantly threatened by endogenous and environmental genotoxic stresses. DNA  
50 damage can arise through the action of reactive oxygen species produced during oxidative metabolism.  
51 DNA lesions can also result from exposure to various chemicals and radiation. When DNA integrity is  
52 challenged, the cell triggers a complex signaling network called the DNA damage response (DDR), that  
53 detects the lesion and organizes its repair (for a review, see Ref Zhou and Elledge 2000). Cells with altered  
54 DDR are more prone to develop a variety of diseases, including cancers (Jackson and Bartek 2009).  
55 Accordingly, genomic instability is a hallmark of cancer cells in which genomic rearrangements  
56 (translocations, deletions, and duplications) are extremely frequent. Many cancer therapies (e.g.  
57 radiotherapy, chemotherapy) rely on the induction of DNA damage to drive the killing of rapidly cycling  
58 tumor cells (Bouwman and Jonkers 2012, Hosoya and Miyagawa 2014). Alkylating agents, such as nitrogen  
59 mustard (e.g. cyclophosphamide) or platinum compounds (e.g. cisplatin), are among the most widely used  
60 anti-cancer drugs. They form DNA cross-links that block replication forks, impede cell division, ultimately  
61 leading to multiple DNA breaks and cell death (Kondo et al. 2010). As efficient DNA repair pathways can  
62 enable tumor cells to survive treatment-induced DNA damage, the identification of new actors  
63 contributing to the DDR may help design alternative therapeutic approaches.

64 We recently linked STING-mediated inflammation to genotoxic stress in the context of breast cancer  
65 (Gaston et al. 2016). As cyclophosphamide is commonly used for breast cancer therapy, we treated MCF7  
66 breast cancer cells with mafosfamide, a cyclophosphamide analog suitable for *in vitro* studies as it does  
67 not require hepatic activation to generate its active metabolite (4-hydroxy-cyclophosphamide) (Mazur et  
68 al. 2012). Such a genotoxic treatment led to the accumulation of DNA in the cytoplasm of MCF7 cells and

69 triggered the expression of IFNs and of several IFN-stimulated genes via the canonical STING/TBK1/IRF-3  
70 pathway. Similar observations were reported by others using other DNA-damaging agents (e.g. etoposide,  
71 cisplatin, cytarabine, irradiation) (Erdal et al. 2017, Ahn et al. 2014, Parkes et al. 2017, Mackenzie et al.  
72 2017, Lan et al. 2014) or even in the context of intrinsic genetic instability characteristic of cancer cells  
73 (e.g. BRCA1-mutant breast cancer cells, U2OS osteosarcoma cells) (Parkes et al. 2017, Mackenzie et al.  
74 2017). While STING-mediated inflammation is broadly considered to promote anticancer immune  
75 responses (Deng et al. 2014, Vanpouille-Box et al. 2017, Wang et al. 2017, Harding et al. 2017), we showed  
76 that abrogation of this inflammatory response *in vitro*, i.e. in absence of a functional immune system,  
77 potentiated treatment-induced cell death and delayed cell colony regrowth, suggesting a cell-autonomous  
78 contribution of the STING/IFN pathway to the resistance of cancer cells to treatment (Gaston et al. 2016).

79 Our study suggested that STING may partly reside in the nucleus of MCF7 cells (Gaston et al. 2016). Indeed,  
80 biochemical cell fractionation showed that STING was intrinsically present in the nuclear fraction,  
81 irrespective of mafosfamide treatment. While STING has been mainly studied as an ER-resident protein,  
82 our observations are reminiscent of its original identification as a nuclear envelope transmembrane (NET)  
83 protein in liver (hence its original name NET23) (Schirmer et al. 2003). Interestingly, the cytosolic DNA  
84 sensor cGAS has been recently shown to translocate to the nucleus upon DNA damage where it contributes  
85 to the DDR by suppressing homologous recombination (HR) (Liu et al. 2018). Conversely, some nuclear  
86 proteins involved in the DDR (e.g. DNA-PKcs, Ku70 or MRE11) have been shown to act as cytosolic DNA  
87 sensor and to activate inflammatory responses (Ferguson et al. 2012, Kondo et al. 2013, Sui et al. 2017,  
88 Burleigh et al. 2020). The dual subcellular localization and function of these acknowledged DNA  
89 sensors/DDR mediators called for investigating further the nuclear localization of STING and its potential  
90 involvement in the DDR.

91 We here demonstrate that STING partly localizes at the inner nuclear membrane (INM) in breast cancer  
92 cells and in patients' tumors, and promotes the DDR in a CDN/TBK1/IRF3-independent manner. As  
93 opposed to its well documented role in stimulating antitumor immunity, our data support that STING  
94 intrinsically promotes breast cancer cell survival both in steady-state and upon genotoxic stress via a non-  
95 canonical, cell-autonomous mechanism.

96 **Results**

97 **STING partly resides in the nucleus of breast cancer cells**

98 Our preliminary observations involving MCF7 breast cancer cell line suggested that a part of the cellular  
99 STING pool resides in the nuclear fraction (Gaston et al. 2016). To challenge this finding in other models,  
100 we investigated a series of so-called HBCx (Human Breast Cancer xenograft) cells generated in-house from  
101 breast cancer Patient Derived Xenograft (PDX). STING was detected in all of them (Fig. 1a) at much higher  
102 level than in MCF7 cells (Fig 1b). Two day-mafosfamide treatment did not significantly alter STING  
103 expression (Fig 1b). In agreement with our former observations (Gaston et al. 2016), STING was detected  
104 in the nuclear fraction of MCF7 cells (Fig 1c, left). In high STING-expressing HBCx-3 cells, massive amounts  
105 of STING were detected in the nuclear fraction (Fig. 1c, middle). A lower quantity was also detected in the  
106 nucleus of HBCx-39 cells that exhibit moderate STING expression (Fig. 1c, right). Since the three breast  
107 cancer cell models exhibited similar fractionation profiles (Fig 1c) despite very different expression level  
108 of STING (Fig 1b), MCF7 cells were privileged for subsequent studies as they can be more easily  
109 manipulated than HBCx models (e.g. more efficient transfection efficiency). To avoid specificity issues  
110 encountered in immunocytofluorescence experiments using commercial anti-STING antibodies (Gaston et  
111 al. 2019), we generated Flag and/or hemagglutinin (HA)-tagged STING constructs. The latter displayed  
112 similar fractionation profile as endogenous STING when ectopically-expressed in MCF7 cells (Fig. 1d) and  
113 in STING-deficient HEK293 cells (Fig 1e,f). This indicates that the presence, the nature (HA, Flag) and the  
114 position (N- or C-terminal) of tags do not alter the biochemical subcellular localization of STING.

115 Taken together, these data show that part of the STING pool resides in the nuclear fraction of various cell  
116 types. When STING is ectopically expressed, this detection in the nuclear fraction is maintained  
117 irrespective of tags.

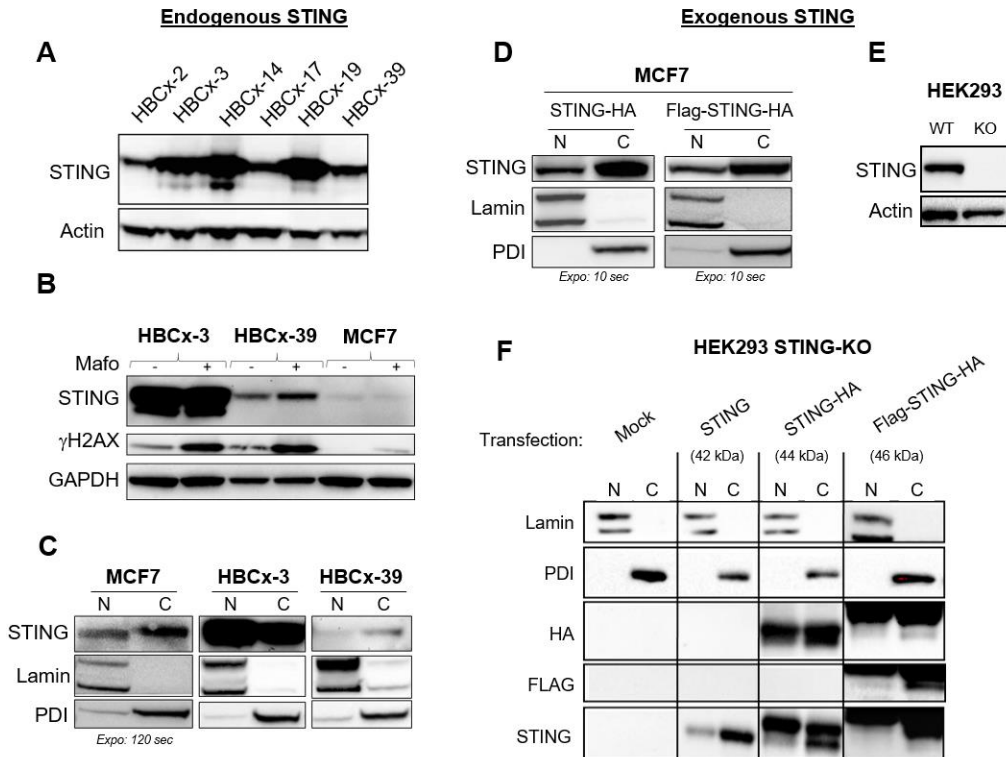

118

119 **Fig 1. Nuclear localization of STING in various cell lines.** **a** Immunoblot of endogenous STING in various PDX-derived  
 120 breast cancer cell lines (named HBCx). **b** Immunoblot of endogenous STING and  $\gamma$ H2AX in HBCx-3 and HBCx-39 *versus*  
 121 MCF7 cells 48h after treatment with (+) or without (-) mafosfamide (10 $\mu$ M). **c,d** Immunoblot of endogenous (**c**) or  
 122 ectopically expressed (**d**) STING in the cytoplasmic (C) and nuclear (N) cell fractions of breast cancer cells. Lamin A/C  
 123 is used as a nuclear marker and the ER-resident Protein Disulfide Isomerase (PDI) as the cytoplasmic marker. In MCF7  
 124 cells, the time of anti-STING blot exposure was adjusted to the expression level of STING, as indicated. **e** Immunoblot  
 125 of endogenous STING in parental *versus* STING-KO HEK293 cells. **f** Immunoblot of lamin A/C, PDI and different tagged  
 126 STING constructs in the cytoplasmic (C) and nuclear (N) fractions of transiently transfected STING-KO HEK293 cells.

127

## 128 **STING co-localizes with the lamina in breast cancer cells**

129 We further characterized STING subcellular localization using immunofluorescence staining. As shown in  
 130 Fig. 2a, STING was uniformly spread within the cytoplasm of MCF7 cells, and, as expected, partially co-  
 131 localized with ER (calnexin) and Golgi (GM130) markers (Saitoh et al. 2009). Strikingly, STING also co-  
 132 localized with lamin B1, a component of the nuclear lamina (Fig 2a, right). The lamina is a fibrillary network  
 133 underlying the inner nuclear membrane (INM) that serves as anchoring point for INM proteins, chromatin  
 134 and transcription factors (Dobrzynska et al. 2016). To further investigate this finding, we performed a pre-  
 135 fixation ribonuclease- and detergent-based cell extraction that preferentially retains cytoskeleton, nuclear

136 matrix and chromatin, at the expense of soluble/loose structures (Britton, Coates, and Jackson 2013,  
137 Sawasdichai et al. 2010). The perinuclear ER and nuclear lamina, but not the Golgi apparatus, were  
138 preferentially retained after this treatment (Fig. S1a). STING strongly co-localized with lamin B1 (Fig. 1b)  
139 and lamin A/C (Fig. S1b) at the nuclear rim (white arrowheads) and at small intranuclear structures (white  
140 arrows) presumably corresponding to nuclear membrane invaginations.

141 To address the clinical relevance of our findings, we investigated the nuclear localization of STING in  
142 malignant breast tumors. First, we analyzed 4 breast cancer PDXs (estrogen receptor-positive [ER+] and  
143 triple negative [TN] subtypes) exhibiting different tissue levels of STING mRNA (high, medium, low; data  
144 not shown). Accordingly, different levels of STING protein were detected in tumor cells by  
145 immunofluorescence, assessing immunostaining specificity (Fig. S2a). In high STING-expressing samples, a  
146 clear co-localization of STING with lamin B1 was observed at the nuclear rim (Fig 2c and Fig. S2b). Second,  
147 we analyzed samples of 6 TN breast cancers resistant to neoadjuvant treatment containing  
148 cyclophosphamide (representative examples are shown in Fig. 2d and Fig. S2c). STING was detected in all  
149 samples analyzed, and in each sample the staining for STING, of various intensities, was present in the  
150 tumor cells. The STING/lamin B1 co-localization was observed at the nuclear rim of tumor cells (Fig 2d and  
151 Fig. S2c, white arrowheads). Some of those cells were in mitosis (Fig 2b, orange arrows).

152 Together, these data demonstrate that in various cell lines, PDXs and clinical tumor samples, a fraction of  
153 the STING pool intrinsically co-localizes with the lamina in the nucleus of breast cancer cells.



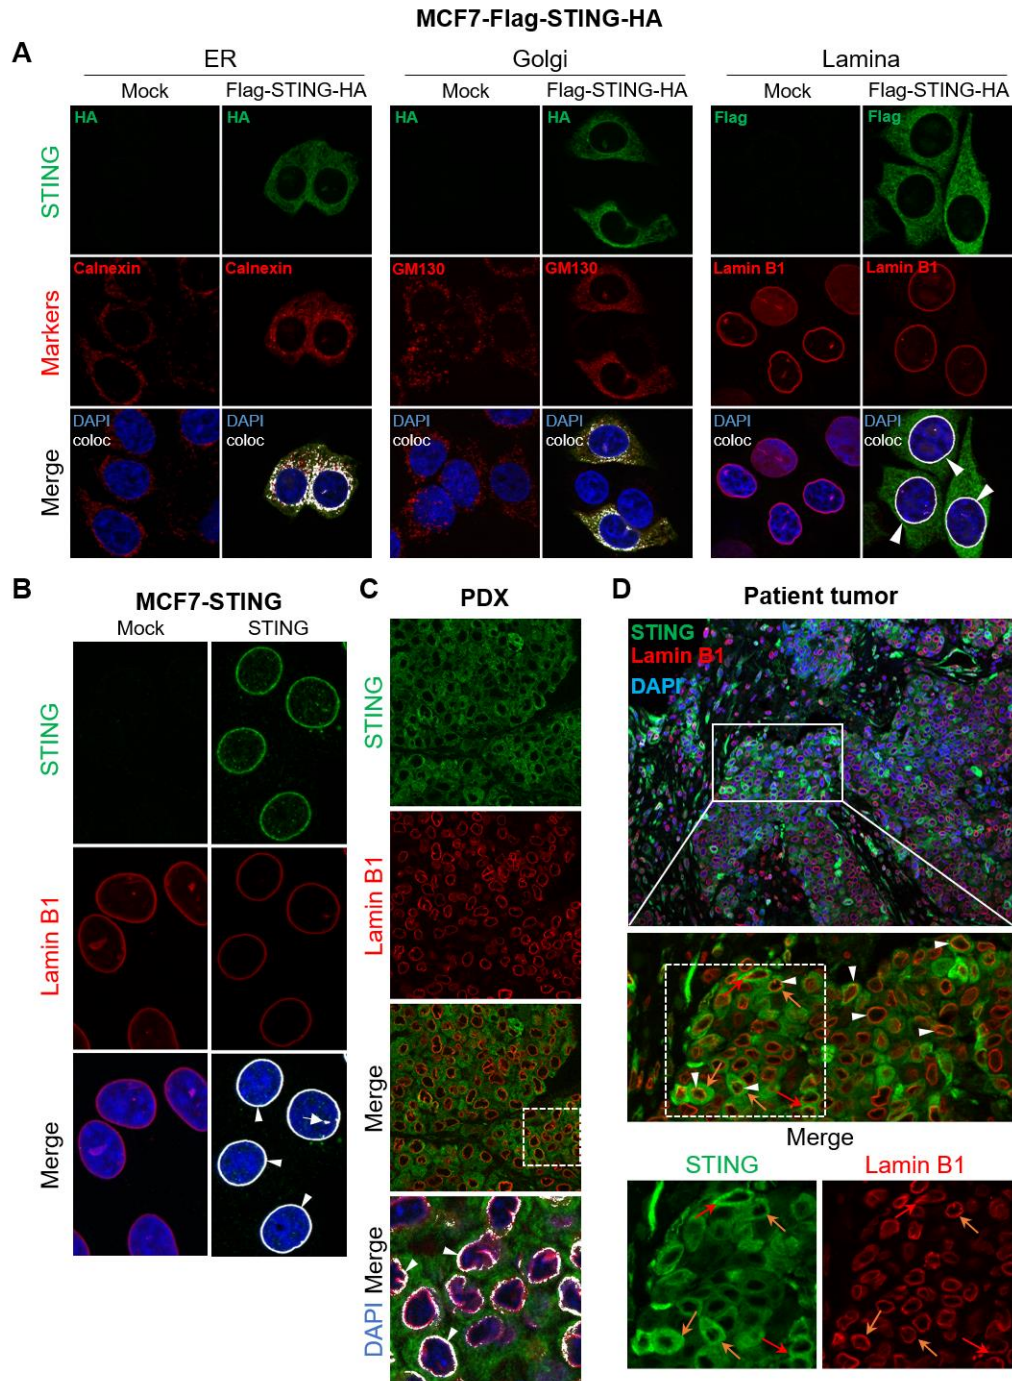

154

155 **Fig 2. Nuclear STING co-localizes with the lamina in breast cancer cells and tumors.** a Immunofluorescence of Flag-  
 156 STING-HA transiently expressed in MCF7 cells (*versus* empty vector, mock), using anti-HA or anti-Flag antibodies  
 157 (according to the species of the antibody directed against subcellular markers) as indicated (upper panels). Middle  
 158 panels show immunofluorescence of ER (calnexin), Golgi (GM130) and nuclear lamina (lamin B1) markers. Lower  
 159 panels display merged images. b Immunofluorescence experiment performed after pre-extraction of MCF7 cells  
 160 transfected with untagged STING (*versus* mock vector), using anti-STING and anti-lamin B1 antibodies. Lower panels



161 display merged images. In **a** and **b**, white arrowheads point to co-localization of STING at the lamina rim, and white  
162 arrows to intra-nuclear staining. Nuclei were stained with DAPI. **c** Immunofluorescence of endogenous STING and  
163 lamin B1 in the high STING-expressing HBCx-19 PDX. Lower panels display merged images with or without DAPI and  
164 image treatment by Image J software (shown as an inset at higher magnification) to emphasize co-localization  
165 (appearing in white). **d** The upper image shows one representative area of a patient tumor immunostained for STING  
166 and lamin B1 (nuclei stained with DAPI). The three bottom panels show higher magnification of the squared area for  
167 STING, lamin B1 and merged staining, as indicated. White arrowheads: examples of STING/lamin B1 co-localization;  
168 orange arrows: cells in mitosis. See also Fig S1 and S2.

169

## 170 **Identification of STING at the INM by electronic microscopy**

171 Considering the transmembrane nature of STING, its co-localization with the lamina, and the resistance of  
172 INM proteins to pre-extraction (Malik et al. 2010), we hypothesized that nuclear STING localizes at the  
173 INM. To explore this hypothesis further, we monitored STING localization by immunogold labeling in  
174 immunoelectron microscopy (EM). STING protein was stained using anti-flag antibody and nanogold  
175 secondary antibody in MCF7 cells expressing Flag-STING-HA construct (Fig. 3a). Immunogold staining  
176 specificity was confirmed using non-transfected cells as a control (Fig. S3a). As shown in Fig. 3b-d, black  
177 dots corresponding to anti-Flag-bound gold particles were observed at cytoplasmic vesicle structures  
178 (white arrowheads) and, in agreement with STING/calnexin co-localization, at perinuclear ER membranes  
179 (grey arrowheads). Consistent with our immunofluorescence results, STING was detected at the periphery  
180 of the nucleus, mainly at proximity of the INM at a distance compatible with immunogold staining of a  
181 transmembrane protein (black arrowheads, Fig. 3c-f). Furthermore, STING was frequently observed at  
182 both sides of nuclear membrane invaginations (Fig. 3f) and sometimes appeared as gold dot doublets (Fig.  
183 3e,f) that likely represent distinct quaternary structures of STING as recently characterized by cryo-EM  
184 (Shang et al. 2019).

185 Cells analyzed 48h after mafosfamide genotoxic treatment showed several signs of stress including nuclei  
186 with irregular shape and large invaginations, picnotic nuclei, dilated ER with dramatically enlarged lumen  
187 and large vesicles filled with cell debris (Fig. S3b, bottom panels). As previously reported (Gonugunta et al.  
188 2017), many cytoplasmic vesicles were positive for STING (Fig. S3b, upper left panel). The various locations  
189 of STING reported above for naïve cells were also observed in mafosfamide-treated cells (Fig. S3b, upper  
190 panels).

191 Taken together, these data demonstrate that in breast cancer cells, the nuclear STING pool mainly resides  
192 at the nucleus periphery and at the INM.

193

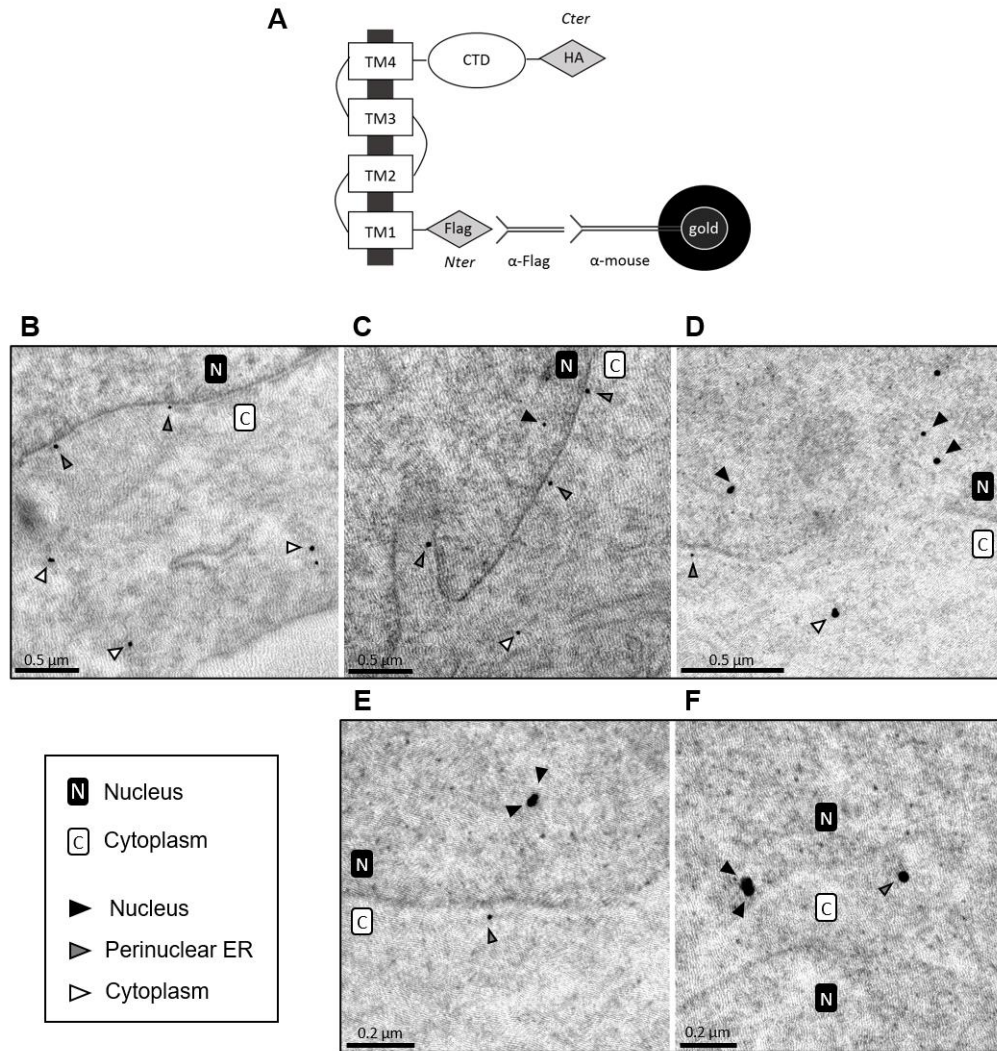

194

195 **Fig 3. STING localizes at the INM.** **a** Schematic representation of the anti-Flag immunogold staining procedure of  
196 MCF7 cells expressing the Flag-STING-HA construct. **b-f** Five representative immunoelectron microscopy images  
197 illustrating typical features of STING subcellular localization identified using symbols displayed in the bottom left box.  
198 Negative control involved parental cells (Fig. S3a). Size bars are indicated in each panel. See also Fig S3.

199

### 200 **STING promotes the DDR**

201 There is accumulating evidence for dual function of proteins involved in the response to cytosolic DNA and  
202 the DDR. The finding that STING partly localizes in the nucleus of breast cancer cells triggered us to inquire  
203 about the potential involvement of STING in the DDR. To investigate this hypothesis, we manipulated the  
204 levels of STING expression and assessed the consequences on DDR efficiency. The formation of 53BP1 (p53

10

205 Binding Protein 1) and  $\gamma$ H2AX (phosphorylated H2AX histone) foci at DNA damage sites is a hallmark of  
206 DDR initiation (Schultz et al. 2000). STING loss-of-function (LOF) using targeted (*versus* non-targeted  
207 [shNT]) shRNA (Fig. S4a) significantly reduced the formation of 53BP1 foci in naïve MCF7 cells, and this  
208 effect was significantly rescued by STING overexpression (Fig. 4a,b). Similar results were observed when  
209 we compared parental *versus* STING-KO HEK293 cells (Fig. 4c and Fig. S4b). We then quantified DNA  
210 damage (single stranded (SSB) and double stranded (DSB) DNA breaks) using the denaturing comet assay  
211 (Fig. 4d). Compared to mafosfamide-treated shNT-MCF7 cells, STING LOF (using two different shRNAs)  
212 doubled the tail moment and this effect was significantly rescued by STING transient expression (Fig. 4d,e  
213 and Fig. S4c). Similar results were obtained in the absence of genotoxic stress in HEK293 and in MCF7 cells  
214 (Fig. 4f). Of interest, in naïve MCF7 cells, STING partly co-localized with 53BP1 foci, mainly at the periphery  
215 of the nucleus, and this effect was amplified under mafosfamide treatment (Fig. 4g). Partial co-localization  
216 was also observed with  $\gamma$ H2AX foci (Fig. 4h).

217

218 Taken together, these data demonstrate that STING promotes the DDR in basal and in genotoxic-induced  
219 stress conditions.

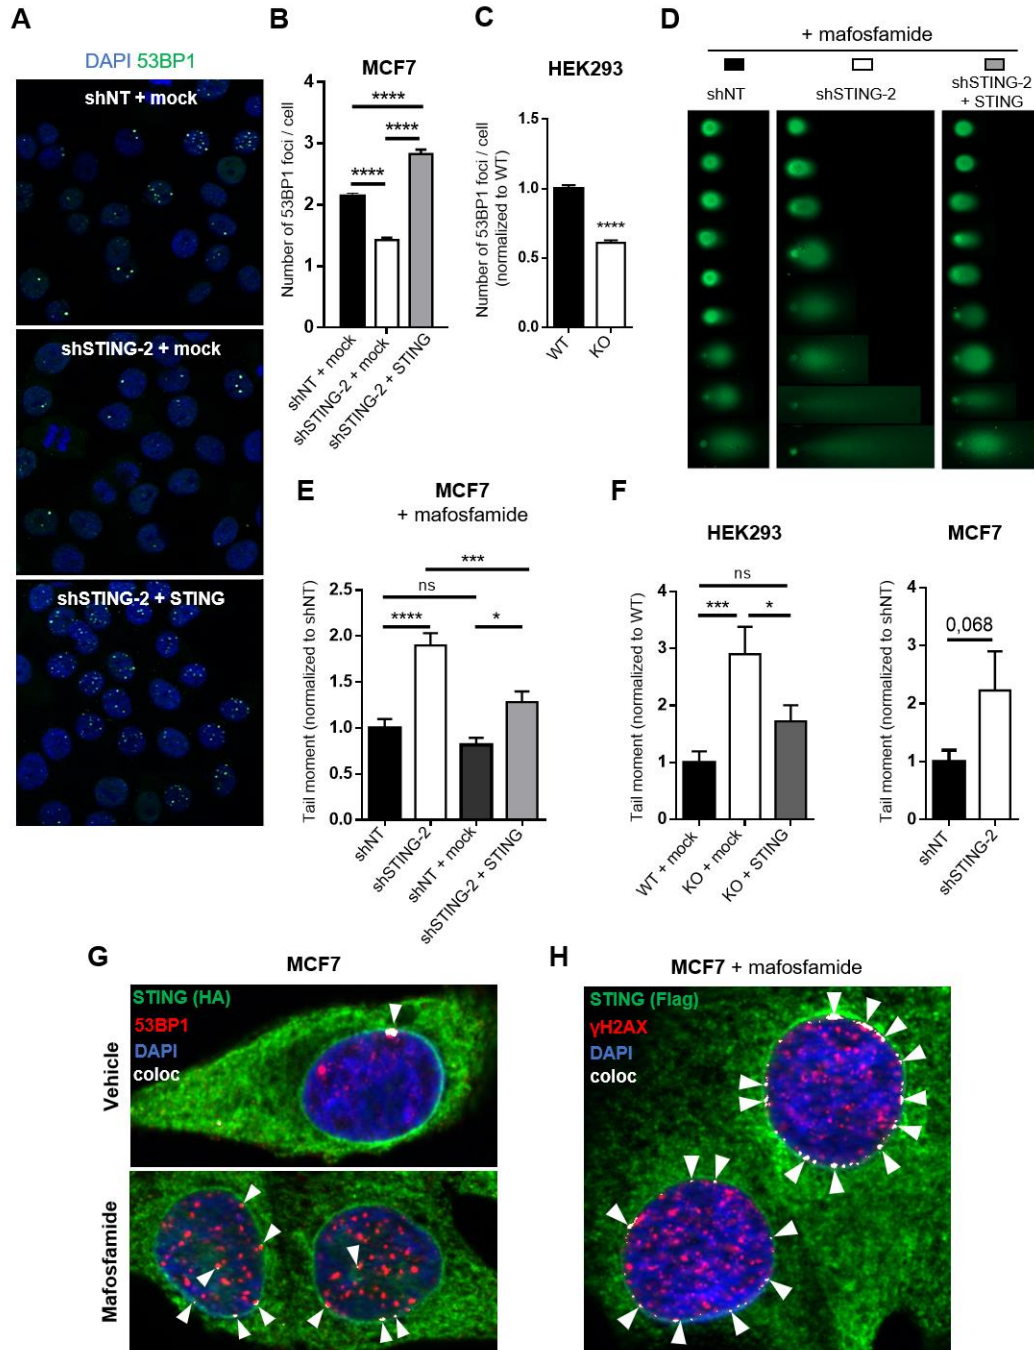

220

221 **Fig 4. STING contributes to the DDR.** a Immunofluorescence of endogenous 53BP1 foci in non-treated MCF7 cells  
 222 transduced with shNT or shSTING-2 and rescued or not for STING expression, as indicated. Nuclei were stained with  
 223 DAPI. Quantification in b: mean  $\pm$  s.e.m. of the number of 53BP1 foci per cell of n= 2,304 (shNT + empty vector), n=  
 224 2,482 (shSTING + empty vector) and n= 2,276 (shSTING + STING vector) cells from n=3 independent experiments  
 225 (one-way ANOVA and post-hoc Tukey's multiple comparisons test). c Quantification of endogenous 53BP1 foci in  
 226 treatment-naïve parental (WT) versus STING-KO HEK293 cells. Mean  $\pm$  s.e.m of n=1,489 (WT) and n=1,419 (KO) cells  
 227 from 3 independent experiments (Student's t-test). d-f Comet assays. Representative images of comet assays (d) and  
 228 quantification of the tail moment with (e) or without (f) mafosfamide treatment of MCF7 cells transduced with

12

229 shSTING-2 versus shNT, and HEK293 cells STING-KO versus WT, rescued (STING) or not (mock) for STING expression,  
230 as indicated. In **e**: mean  $\pm$  s.e.m. of tail moment of n= 746 (shNT), n= 976 (shSTING-2), n= 776 (shNT + mock plasmid)  
231 and n= 605 (shSTING-2 + STING vector) cells from n=3 independent experiments (one-way ANOVA and post-hoc  
232 Tukey's multiple comparison test). In **f**: mean  $\pm$  s.e.m of tail moment of n=91 (HEK WT + mock), n=89 (HEK-KO +  
233 mock), n=117 (HEK-KO + STING), n=132 (MCF7-shNT) and n=118 (MCF7-shSTING-2) cells (HEK cells: one-way ANOVA  
234 and post-hoc Tukey's multiple comparison test, MCF7 cells: Student's t-test ). **g,h** Immunofluorescence analysis of  
235 STING, 53BP1 and  $\gamma$ H2AX foci. Colocalization (arrowheads) of STING with 53BP1 (**g**) and  $\gamma$ H2AX (**h**) in MCF7-Flag-  
236 STING-HA cells treated for 48h with vehicle or mafosfamide, as indicated. See also Fig S4.

237

### 238 **STING promotes intrinsic breast cancer cell survival and resistance to genotoxic stress**

239 Several recent studies reported that STING-mediated cytokine production promoted anticancer immune  
240 responses (Deng et al. 2014, Vanpouille-Box et al. 2017, Wang et al. 2017, Harding et al. 2017). However,  
241 the involvement of STING in the DDR uncovered in this study suggests a potential cell-autonomous  
242 contribution of STING to cancer cell survival.

243 To address this issue, we investigated whether manipulation of STING expression impacted cancer cell  
244 survival *in vitro*, i.e. in absence of a functional immune system. Clonogenic survival assays were used to  
245 address the ability of cancer cell to survive and resume proliferation after genotoxic treatment. In MCF7  
246 and BT20 breast cancer cell lines, STING depletion significantly reduced the number of mafosfamide-  
247 resistant clones observed 40 days post-treatment (Fig 5a,b). Conversely, transient STING overexpression  
248 at the time of drug addition markedly enhanced resistance to treatment as reflected by the higher number  
249 of clones at day 20 (Fig 5c). To broaden these findings, we tested various experimental conditions using  
250 standard cell viability assays as readouts. First, STING expression was transiently silenced in various breast  
251 cancer cell models using siRNA (Fig 5d), and cell viability (*versus* siNT-treated cells) was measured 10 days  
252 later. STING inhibition drastically reduced cell viability in various ER+ and TN breast cancer models  
253 including MCF7 (Fig 5e), BT20, HCC1937 and four HBCx cell lines (Fig. 5f). In HBCx cells, cell survival was  
254 inversely proportional to siRNA efficiency (due to poor transfection efficacy of some models). Second, we  
255 performed viability assays under genotoxic conditions. These experiments were performed using stable  
256 STING-deficient systems in order to circumvent any bias due to the intrinsic toxicity of transient  
257 transfection procedures. In addition to mafosfamide, which generates DNA breaks by cross-linking  
258 nucleotides, we also investigated the response to Etoposide, another class of genotoxic agent that  
259 stabilizes transient DSB via inhibition of the topoisomerase II. Although Etoposide is irrelevant to breast  
260 cancer therapy, it is frequently used in DNA damage studies. In both MCF7 and HEK293 cells and



261 irrespective of the genotoxic agent, STING deficiency significantly increased drug-sensitivity. Although of  
 262 moderate amplitude, this effect was highly robust (Fig 5g-j).  
 263 Together, these data demonstrate that STING promotes breast cancer cell survival and contributes to  
 264 resistance to genotoxic stress in a cell-autonomous manner.

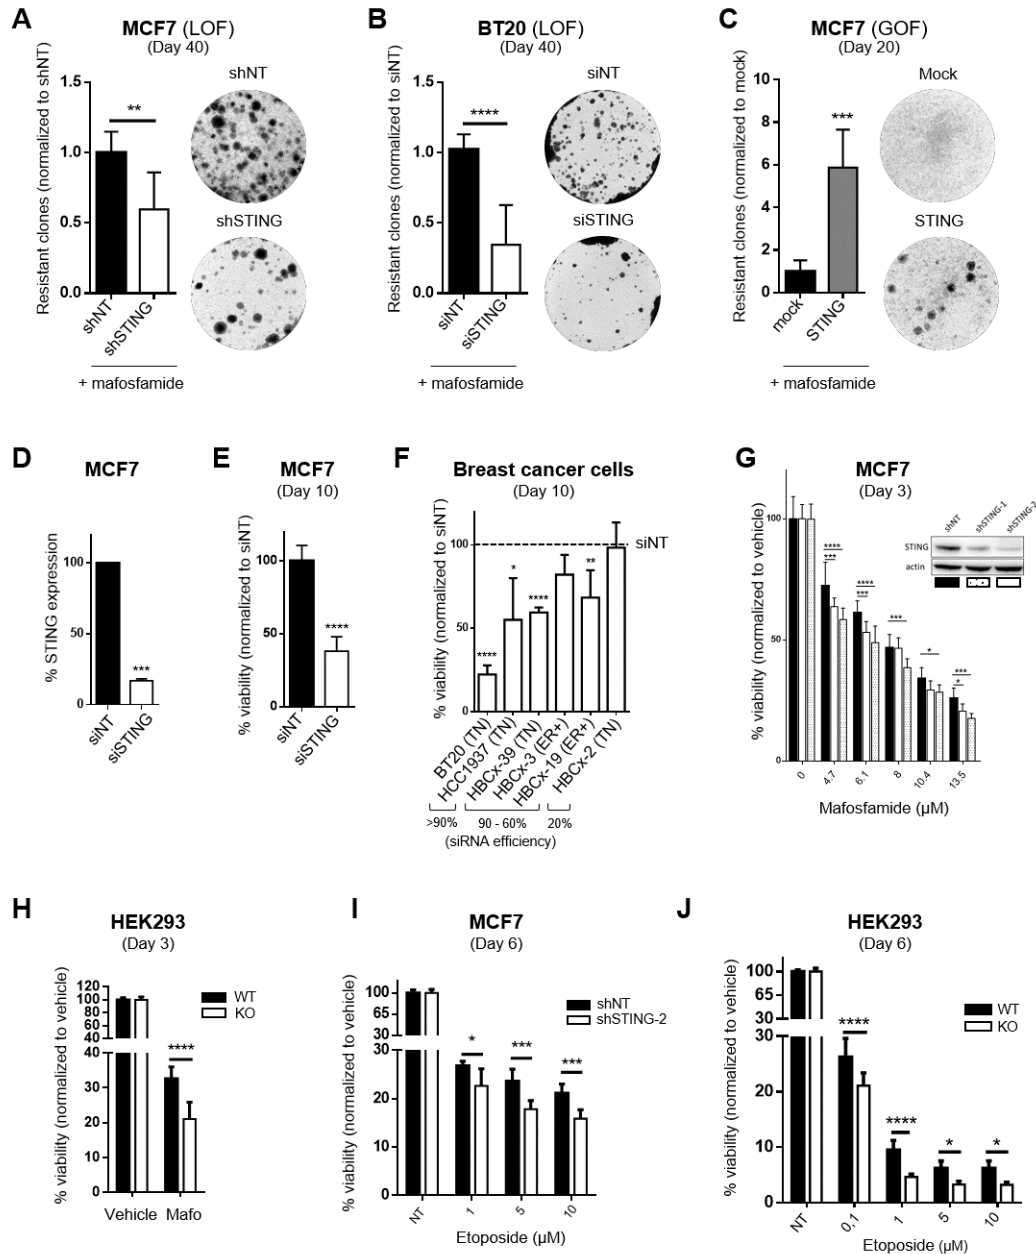

265

266 **Fig 5. STING promotes intrinsic breast cancer cell survival and resistance to genotoxic stress.** a-c GOF and LOF colony  
 267 assays of MCF7 (a,c) and BT20 (b) cells showing the regrowth of cells 40 days (a,b) or 20 days (c) after exposure to  
 268 mafosfamide (10  $\mu$ M). MCF7 cells were stably transduced with shNT or shSTING prior to treatment (a) and rescued  
 269 or not (mock vector) (c) by the transfection of a STING-encoding plasmid the day of mafosfamide treatment. In BT20



270 cells (**b**), STING was silenced by siRNA 3 days before mafosfamide exposure. Representative wells are shown. Mean  
271  $\pm$  s.d. of n=9 from 3 independent experiments, Student's t-test. **d-f** Effect of transient STING silencing in naïve breast  
272 cancer cells. **d** RT-qPCR analysis showing the efficacy of a siRNA targeting *STING* (siSTING) versus a non-targeted  
273 siRNA (siNT) (Student's t-test, n=2 independent experiments). **e,f** Viability of MCF7 cells (**e**) (Mean  $\pm$  s.d. of n=9 from  
274 3 independent experiments, Student's t-test) and of two immortalized and four PDX-derived breast cancer HBCx cells  
275 (**f**) (Mean  $\pm$  s.d. of n=6 from 2 independent experiments, Student's t-test) 10 days after transfection with siNT versus  
276 siSTING. In **f**, the molecular subtype (ER, TN) and the efficiency of siRNA to inhibit *STING* expression is indicated. **g-j**  
277 Effect of stable STING silencing on MCF7 and HEK293 cells sensitivity to genotoxic treatment. **g** Cell viability of MCF7  
278 cells stably transduced with either shNT or shRNAs targeting *STING* was measured 3 days after treatment with various  
279 doses of mafosfamide (mean  $\pm$  s.d. of n=9 from 3 independent experiments, two-way ANOVA and post hoc Dunnett's  
280 multiple comparison test). **h** Cell viability of parental HEK293 versus STING-KO HEK293 cells 3 days after exposure to  
281 5  $\mu$ M mafosfamide (mean  $\pm$  s.d. of n=10 from 2 independent experiments, two-way ANOVA and post hoc Sidak's  
282 multiple comparison). **i,j** Same as in **g** and **h** but 6 days after exposure to various doses of etoposide, as indicated  
283 (mean  $\pm$  s.d. of n=12 from 2 independent experiments, two way ANOVA and post hoc Sidak's multiple comparison).

284

## 285 **STING-mediated promotion of DDR and cell survival is independent of its canonical pro-inflammatory** 286 **pathway**

287 The canonical STING/TBK1/IRF-3/IFN pathway has been shown by us and others to be activated in various  
288 preclinical breast cancer models in response to genotoxic stress (Li and Chen 2018, Legrier et al. 2016,  
289 Gaston et al. 2016, Erdal et al. 2017, Parkes et al. 2017). This raised the question whether this inflammatory  
290 pathway could interfere with the novel function of STING discovered in the present work. The fact that  
291 STING contributes to the DDR in the absence of genotoxic stress, i.e. in culture conditions lacking IFN  
292 induction (Gaston et al. 2016), was against this hypothesis. Nonetheless, we aimed to address this issue  
293 experimentally. First, exogenous activation of the STING/TBK1/IFN pathway using the CDN cGAMP (a  
294 typical STING agonist; see Ref. (Ablasser et al. 2013)) expectedly triggered IFN signaling as reflected by the  
295 upregulation of typical IFN-stimulated genes (Fig 6a), but had no impact on the formation of 53BP1 foci  
296 (Fig. 6b). Second, in contrast to STING LOF (Fig. 4b), TBK1 silencing (Fig. 6c) did not impair the formation  
297 of 53BP1 foci, that was even slightly increased (Fig. 6d). Third, a naturally occurring C-terminally truncated  
298 STING isoform has been shown to act as a dominant-negative (DN) of full-length STING on IFN induction  
299 due to its inability to interact with TBK1/IRF3 complex (Chen et al. 2014). Cell fractionation analyses  
300 showed that STING-DN displayed similar subcellular distribution compared to full-length STING, although  
301 the former tended to be predominant in the nucleus fractions (Fig. 6e). Expression of STING-DN in a shRNA-  
302 mediated-STING-deficient background was sufficient to protect MCF7 cells from DNA damage  
303 accumulation as revealed by the comet assay (Fig. 6f). Fourth, as opposed to STING silencing, IFN receptor

304 (IFNAR1) silencing (Fig. 6g) had no effect on MCF7 cell survival in steady-state as well as 10 days after  
 305 mafosfamide treatment (Fig. 6h), i.e. when IFN production has been triggered (Gaston et al. 2016).  
 306 Taken together, these data strongly suggest that STING promotes the DDR and cancer cell survival in a cell-  
 307 autonomous and CDN/TBK1/IFN-independent manner.

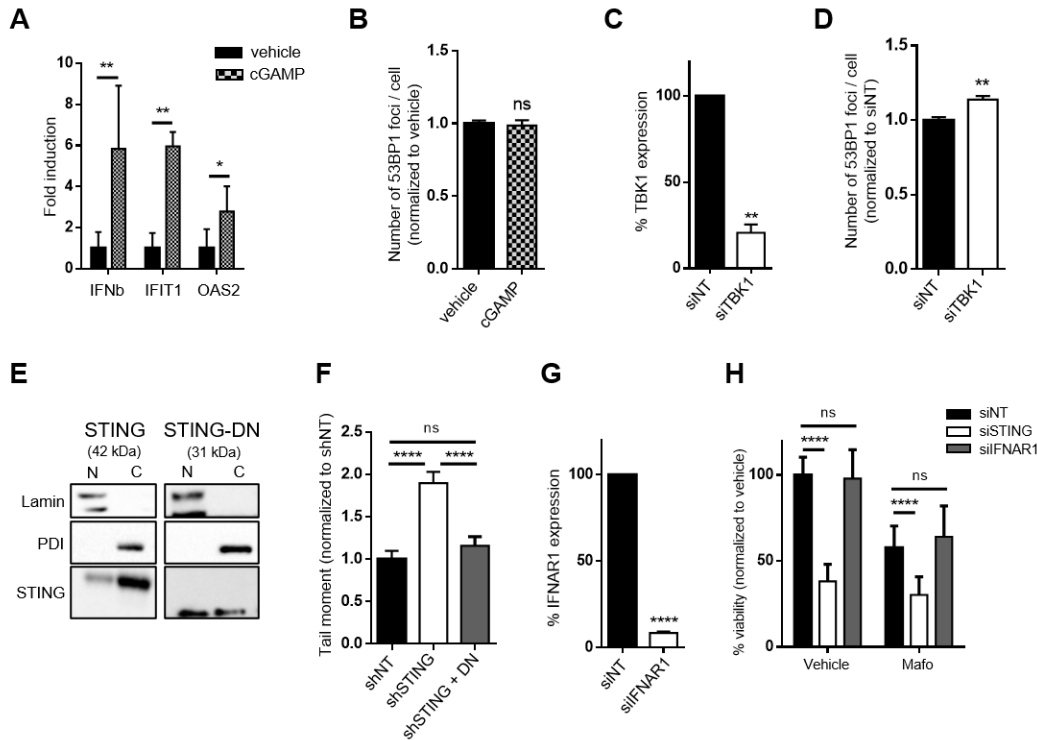

308

309 **Fig 6. The effects of STING on the DDR and cell survival are independent of the canonical inflammatory pathway.**  
 310 **a** RT-qPCR analysis of *IFN $\beta$* , *IFIT1* and *OAS2* expression in MCF7 cells 6h after exposure to the CDN cGAMP. Mean  $\pm$   
 311 s.d. of n=3 independent experiments, Student's t-test. **b** Effect of cGAMP treatment on the formation of 53BP1 foci  
 312 in MCF7 cells as determined by immunofluorescence. Mean  $\pm$  s.e.m of the number of foci per cell in n=3,134 (vehicle)  
 313 and n=3,204 (agonist) cells from n=3 independent experiments (Student's t-test). **c** RT-qPCR analysis of endogenous  
 314 TBK1 in MCF7 cells transfected with a siRNA targeting TBK1 (siTBK1) versus a non-targeted siRNA (siNT) (Student's t-  
 315 test, n=2 independent experiments). **d** Effect of TBK1 silencing on the formation of 53BP1 foci in MCF7 cells as  
 316 determined by immunofluorescence. Mean  $\pm$  s.e.m of the number of foci per cell in n= 2640 (shNT) and n= 2340  
 317 (siTBK1) cells from n=3 independent experiments (Student's t-test). **e** Immunoblot of STING and STING-DN in  
 318 cytoplasmic (C) and nuclear (N) fractions prepared from transiently transfected MCF7 cells. **f** Tail moment of MCF7  
 319 stably transduced with shNT or shSTING-2 with or without rescue using a STING-DN expression vector. Mean  $\pm$  s.e.m.  
 320 of tail moment of n= 746 (shNT), n= 976 (shSTING-2), and n= 871 (shSTING-2 + STING-DN plasmid, STING-DN) cells  
 321 from n=3 independent experiments (one-way ANOVA and post-hoc Tukey's multiple comparison test). **g** RT-qPCR  
 322 analysis of endogenous *IFNAR1* expression in MCF7 cells transfected with a siRNA targeting *IFNAR1* (siIFNAR1) versus  
 323 a non-targeted siRNA (siNT) (Student's t-test, n=2 independent experiments). **h** Viability of MCF7 cells 10 days after  
 324 transfection with siNT, siSTING or siIFNAR1 exposed (right) or not (left) to mafosfamide (10  $\mu$ M) 3 days after  
 325 transfection. Mean  $\pm$  s.d of n=9 from 3 independent experiments, two way ANOVA and post hoc Dunnett's multiple  
 326 comparison test.

## 327 **Determination of nuclear STING interactome using mass spectrometry**

328 To shed light on the potential mechanism by which STING could promote the DDR, we performed an  
329 interactomics analysis. STING was immunoprecipitated from nuclear extracts that were treated with  
330 Benzonase beforehand to avoid DNA- or RNA-mediated co-precipitation (Fig. S5a), and the proteins eluted  
331 were identified and quantified by mass spectrometry. We confirmed that immunoprecipitates were  
332 significantly enriched for STING and nuclear proteins (Fig. S5b and Table S1). Interestingly, none of the  
333 canonical STING interactors (e.g. TBK1, IRF3, MAVS or STAT6) (Ishikawa and Barber 2008, Chen et al. 2011,  
334 Liu et al. 2015) could be identified in nuclear STING interactome (Table S1). Functional analysis of the  
335 nuclear proteins specifically immunoprecipitated by STING revealed the enrichment of three functional  
336 networks: DNA-repair, mRNA splicing and eukaryotic translation elongation (STRING database, Fig. 7a).

337 Given the contribution of STING to the DDR uncovered in this work, we focused on proteins of the DNA  
338 repair network. The latter contains many proteins involved in chromatin remodeling complexes that  
339 facilitate the efficacy of DNA damage signaling and/or repair, e.g. SMARCA5 (Smeenk et al. 2013), ACTL6A  
340 (Lans, Marteiijn, and Vermeulen 2012), SUPT16H (Oliveira et al. 2014), RUVBL1/2 (Clarke et al. 2017), SMC3  
341 (Potts, Porteus, and Yu 2006) and HMGB2 (Shin et al. 2013) (Fig 7a, b). However, the most striking  
342 observation was the identification of the three core proteins forming the DNA-dependent protein kinase  
343 (DNA-PK) complex as part of STING interactome: DNA-PK catalytic subunit (DNA-PKcs), Ku70 (aka XRCC6)  
344 and Ku80 (aka XRCC5) (Fig. 7a, b). DNA-PK, together with ATM and ATR, is a master regulator of the DDR  
345 (Blackford and Jackson 2017). DNA-PK is mostly known for its involvement in DSB repair through  
346 promotion of the Non-Homologous End Joining (NHEJ) repair pathway (reviewed in Ref. Neal and Meek  
347 2011). It is also involved in Homologous Recombination (HR) repair pathway (Neal et al. 2011), checkpoint  
348 activation (Liu et al. 2012) and transcription regulation (Pankotai et al. 2012, Calkins, Iglehart, and Lazaro  
349 2013) following DNA damage. This prompted us to investigate further the relevance of DNA-PK regarding  
350 nuclear STING.

351 STING and DNA-PK interaction was confirmed by co-immunoprecipitation experiments involving  
352 benzonase-treated extracts from i) tagged (Supplemental Fig. S5c) and untagged (Supplemental Fig. S5d)  
353 STING ectopically-expressed in MCF7 cells, ii) endogenous STING in HBCx-3 and HEK293 cells (Fig. 7c), and  
354 iii) DNA-PKcs immunoprecipitations showing STING enrichment in addition to Ku70/80 (right lanes of Fig.  
355 7c and Supplemental Fig. S5d). Importantly, TBK1 silencing did not impair STING and DNA-PK interaction,  
356 further arguing for the independence of nuclear STING pathway from the canonical cytosolic inflammatory  
357 pathway (Fig 7d). Finally, we examined whether STING impacts DNA-PK complex assembly on chromatin

358 using a previously described protocol (Ochi et al. 2015). As shown in Fig. 7e, STING overexpression  
359 markedly enhanced the amount of chromatin-bound DNA-PK complex proteins (lane 2 vs 1) without  
360 affecting their expression at the cellular level (lane 6 vs 5). In agreement with genotoxic-induced DNA  
361 damage, the amount of chromatin-associated DNA-PK complex increased upon mafosfamide treatment  
362 and this was further enhanced in the context of STING overexpression (lane 4).

363 Together, these pioneering observations suggest that STING may cooperate with the DDR regulator DNA-  
364 PK, both in basal and in genotoxic-induced stress conditions.

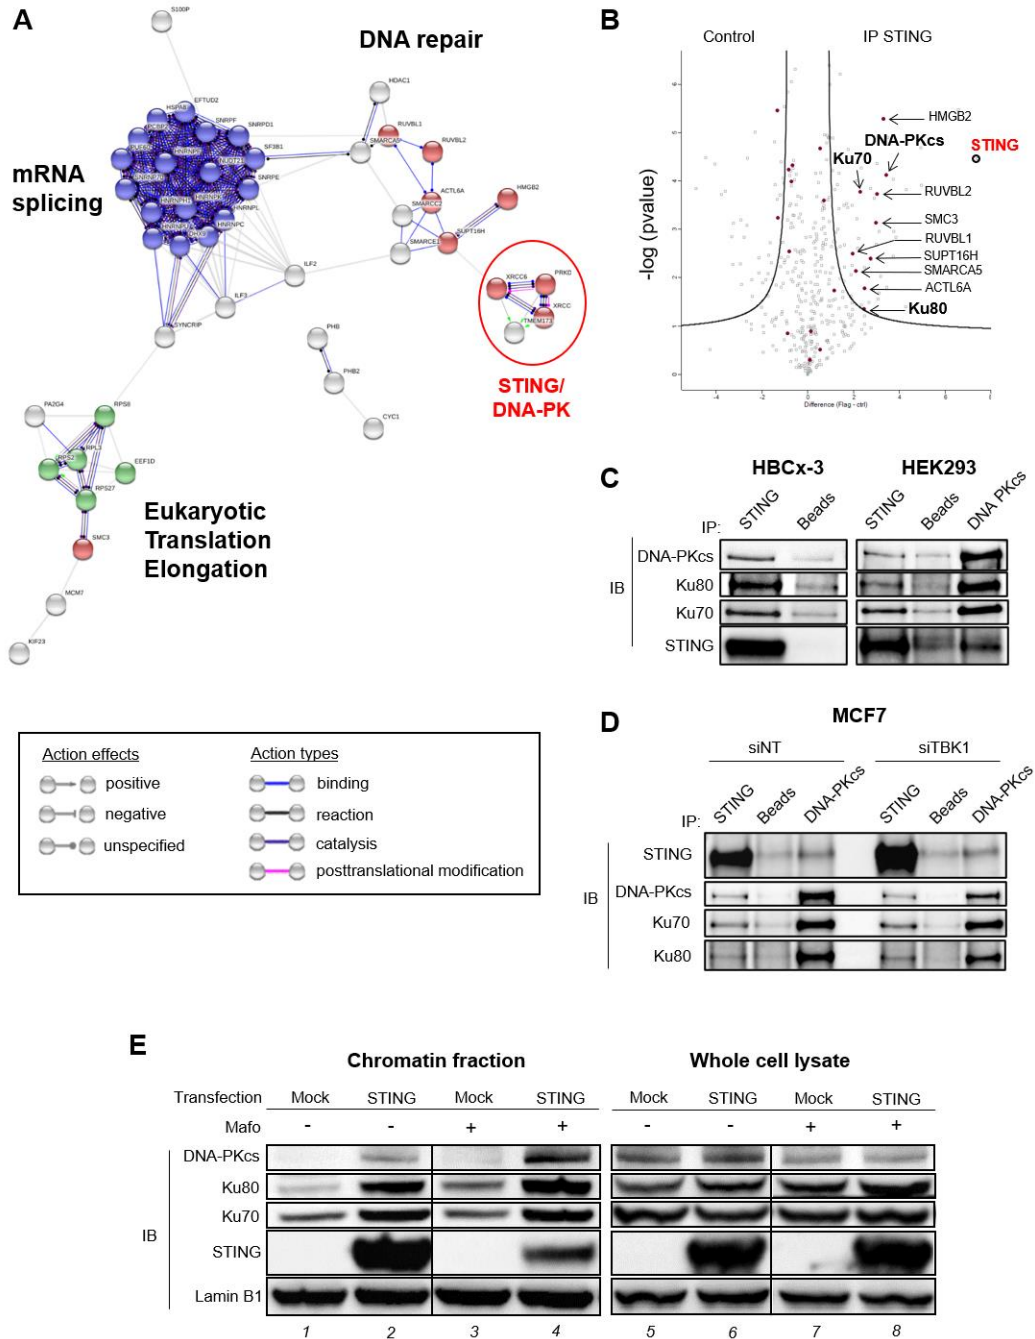

365

366 **Fig 7. Nuclear STING interactome by mass spectrometry**

367 **a** Functional networks of nuclear STING interactome using STRING database (interaction score high evidence=0,700).  
 368 Proteins involved in mRNA splicing (FDR=1.22e-18) and Eukaryotic Translation Elongation (FDR=0.00025) pathways,  
 369 as per Reactome database, are highlighted in blue and green, respectively. Proteins involved in DNA repair according  
 370 to GO terms (FDR=0.00016) are highlighted in red. **b** Volcano plot of  $-\log(pvalue)$  versus fold change (expressed in  
 371  $\log_2$ ) of proteins present in anti-STING immunoprecipitates versus negative control as detected by mass  
 372 spectrometry. Proteins previously reported to be involved in DNA repair (Gene Ontology Cell Component database)  
 373 are colored in magenta. **c** Immunoblots (IB) of proteins constituting the DNA-PK complex (DNA-PKcs, Ku80, Ku70) in

19

374 immunoprecipitates of endogenous STING expressed in HBCx-3 and HEK293 cells. The reverse immunoprecipitation  
375 was performed in HEK293 cells using anti-DNA-PKcs antibody (right lane). **d** Effect of TBK1 silencing on STING/DNA-  
376 PK complex formation in MCF7 cells as assessed by co-immunoprecipitation. In **c-d**, the negative control involved  
377 beads only. **e** Immunoblot of proteins constituting the DNA-PK complex (DNA-PKcs, Ku80, Ku70) in the chromatin  
378 fractions (lanes 1-4) *versus* whole cell lysates (lanes 5-8) of MCF7 cells overexpressing untagged STING or not (mock)  
379 and treated (+) or not (-) with mafosfamide (10 $\mu$ M) for 48h. Lamin B1 is used as a loading control. See also Fig S5.

380

## 381 **Discussion**

382 In this study we report that STING is partly found in the nucleus of various preclinical models and clinical  
383 specimens of cytotoxic treatment-resistant breast cancer, and preferentially localizes at the INM. STING  
384 promotes the DDR and enhances cancer cell survival in both basal conditions and genotoxic-induced stress.  
385 Importantly, these effects are cell-autonomous and independent of the classical CDN/TBK1/IFN  
386 inflammatory response, thus identifying a novel functional pathway for STING. Pioneering observations  
387 suggest that STING may cooperate with the DDR regulator DNA-PK. Although future work is needed to  
388 decipher this new mechanism, the involvement of STING in such a fundamental cellular process as DDR  
389 adds a level of complexity to our understanding of this multi-faceted protein in general, and especially in  
390 the context of cancer.

391 STING has been mostly characterized as a transmembrane protein that resides in various cytoplasmic  
392 organelles, in agreement with its canonical adaptor function to trigger inflammatory responses upon  
393 cytosolic DNA sensing by cGAS (Barber 2015). In this study, we showed by cell fractionation that a part of  
394 the STING pool intrinsically resides in the nucleus of various malignant and non-malignant cells,  
395 generalizing our preliminary data involving MCF7 cells (Gaston et al. 2016). Its localization to the INM was  
396 supported by STING/lamin co-immunostaining and by immunoelectron microscopy analyses. Importantly,  
397 STING/lamin co-localization was also observed in PDXs and in all clinical specimens that we analyzed. In  
398 their pioneering work, Schirmer and colleagues identified STING as a NET protein (NET23) and tentatively  
399 localized it to the ONM using high resolution fluorescence imaging (Schirmer et al. 2003, Malik et al. 2014).  
400 INM *versus* ONM localizations may not be mutually exclusive as protein addressing to the INM has been  
401 proposed to involve initial protein insertion into ER membranes followed by diffusion to the contiguous  
402 ONM and INM (reviewed in Ref. Katta, Smoyer, and Jaspersen 2014). As observed for typical INM-resident  
403 proteins such as Emerin (Sullivan et al. 1999), Schirmer team showed that STING failed to localize to the  
404 nuclear envelope in lamin A/C-deficient cells (Malik et al. 2010). In addition, STING was shown to



405 participate in chromatin compaction in various cell types, and interaction with epigenetic silencing factors  
406 was proposed to occur at the INM (Malik et al. 2014).

407 The mechanism of STING recruitment to the INM remains to be elucidated. Mechanisms regulating protein  
408 addressing to the INM are poorly understood. One model of protein recruitment to the INM suggests a  
409 passive diffusion of proteins from ONM to INM through the nuclear pore complexes and retention at the  
410 INM via interactions with lamins, chromatin and/or other proteins (Wu, Lin, and Worman 2002, Katta,  
411 Smoyer, and Jaspersen 2014). Interestingly, nuclear STING interactome comprises the INM protein  
412 TMEM43 that is thought to be involved in nuclear envelope organization, as exemplified by its critical role  
413 in Emerin retention at the INM (Bengtsson and Otto 2008). An alternative model proposes that INM  
414 proteins contain a nuclear localization signal (NLS)-like motif which is recognized by a karyopherin for an  
415 active transport (King, Lusk, and Blobel 2006). Using a NLS prediction software (Kosugi et al. 2009), we  
416 found that STING harbors a predicted bipartite NLS motif at the N-terminus (aa 14-46) compatible with  
417 both nuclear and cytoplasmic localization. The C-terminally truncated STING-DN isoform contains one  
418 additional putative NLS (aa 272-281) exhibiting high confidence score, which is consistent with the  
419 preferential accumulation of this isoform in the nuclear fraction that we observed in cell fractionation  
420 assays.

421 This is the first study reporting the involvement of STING in the DDR. STING LOF reduced DDR foci  
422 formation (53BP1 and  $\gamma$ H2AX) and increased the accumulation of spontaneous and genotoxic-induced DNA  
423 breaks. STING GOF had the opposite effect. Accordingly, the proteomic analysis performed in this study  
424 revealed that nuclear STING interactome contains several proteins involved in DSB DNA repair: SMARCA5  
425 has been shown to promote DSB repair *via* both NHEJ and HR pathways in an ubiquitin-dependent manner  
426 (Smeenk et al. 2013); RUVBL1, RUVBL2 and ACTL6A belong to a histone acetyltransferase complex that  
427 modulate 53BP1 DNA binding and the NHEJ/HR balance (Lans, Marteiijn, and Vermeulen 2012, Jacquet et  
428 al. 2016, Clarke et al. 2017); SUPT16H cooperates with the ubiquitin ligase RNF20 to promote HR (Oliveira  
429 et al. 2014); SMC3, a constituent of the cohesion complex, is thought to promote HR by maintaining  
430 chromatid sister in close proximity (Potts, Porteus, and Yu 2006). Besides these partners, the most  
431 remarkable finding was that nuclear STING interacts with the DNA-PK complex. Although the functional  
432 pleiotropy of DNA-PK is emerging (Goodwin and Knudsen 2014, Mohiuddin and Kang 2019), it is mostly  
433 known for its role in NHEJ activation and initiation (Neal and Meek 2011). As we showed that STING GOF  
434 enhanced DNA-PK protein complex assembly on the chromatin (without affecting their level of  
435 expression), it is possible that STING could help recruit and/or stabilize the complex at DNA damage sites.

436 Interestingly, DNA-PK and STING have already been shown to cooperate in the context of innate immune  
437 response to cytosolic DNA. Indeed, co-immunoprecipitation assays from whole-cell extracts revealed the  
438 interaction of STING with Ku70 (Ferguson et al. 2012, Morchikh et al. 2017) and DNA-PKcs (Morchikh et al.  
439 2017), and DNA-PK was identified as a DNA sensor triggering inflammatory responses in a  
440 STING/TBK1/IRF3-dependent manner (Ferguson et al. 2012, Morchikh et al. 2017). Together with the  
441 findings reported in our study, these data establish DNA-PK as a novel canonical STING interactor.

442 The localization of STING at the INM, where it colocalizes with peripheral DDR foci, is also of particular  
443 interest as there is emerging evidence that the nuclear envelope is involved in DNA repair  
444 compartmentalization (Marnef and Legube 2017). In yeast (Oza et al. 2009) and drosophila (Ryu et al.  
445 2015), persistent or hard-to-repair DSBs relocate to the nuclear periphery where they are anchored to  
446 nuclear pore or INM proteins to be repaired. While DSB mobility to the nuclear periphery has not been  
447 described in mammals yet, subnuclear structures with dedicated types of DNA repair have been observed.  
448 Hence, in yeast and mammals, DSBs in chromatin domains associated with the nuclear envelope and  
449 nuclear pores are preferentially repaired by error-prone pathways, such as NHEJ, alt-NHEJ and Break  
450 Induced Replication (BIR) (Lemaitre et al. 2014, Chung et al. 2015). Further studies are required to  
451 determine precisely by which mechanism and at which level (i.e. detection, signaling,  
452 compartmentalization and/or repair) STING functionally impacts the DDR.

453 Beyond DNA repair proteins, nuclear STING interactome was also enriched in proteins involved in two  
454 other functional networks, namely protein synthesis and mRNA splicing. Interestingly, STING has been  
455 shown recently to inhibit host and viral protein synthesis in the context of RNA virus infection. The  
456 mechanism was not fully elucidated but involves STING-dependent collapse of polysomes (Franz et al.  
457 2018). Moreover, STING interactor DNA-PK was recently shown to promote ribosome biogenesis, thus  
458 impacting global protein synthesis. Indeed, DNA-PK was shown to bind U3 snoRNA to promote pre-rRNA  
459 splicing into mature 18S rRNA (Shao et al. 2020). Further work is needed to determine the potential role  
460 of STING in those pathways and whether this could impact the DDR.

461 Based on the evidence that STING is critical for antitumor immune responses, the current clinical trend is  
462 to boost STING signaling using STING agonists to enhance tumor eradication by the immune system of the  
463 host (reviewed in Ref. Rivera Vargas, Benoit-Lizon, and Apetoh 2017). However, the overall benefit of this  
464 therapeutic strategy remains elusive, as recent studies have demonstrated that STING-mediated  
465 inflammation can result in pro-tumoral and pro-metastatic effects (Ahn et al. 2014, Gaston et al. 2016, Liu

466 et al. 2018, Bakhroum et al. 2018). Our study identifies DDR as an additional cell-autonomous mechanism  
467 by which STING may contribute to tumor progression as well as to resistance to DNA-damaging therapies.  
468 Accordingly, in samples of chemotherapy-resistant breast tumors, STING levels (and co-localization with  
469 lamina) were particularly elevated in proliferating cells that drive tumor regrowth. This is consistent with  
470 clonogenic *in vitro* assays showing that higher STING expression intrinsically promoted survival and  
471 regrowth of breast cancer cells exposed to genotoxic stress, while STING deficiency sensitized cells to  
472 treatment.

473 In conclusion, we uncovered a new subcellular localization of STING at the INM of breast cancer cells and  
474 provided unprecedented evidence supporting its involvement in the DDR. This newly-identified function  
475 highlights a cell-autonomous pathway by which STING promotes cancer cells survival and resistance to  
476 DNA-damaging agents. Importantly, the effects of STING on the DDR, cell survival and drug resistance were  
477 independent of the canonical CDN/TBK1/IFN pathway. This suggests that in the clinical setting, therapeutic  
478 strategies that aim at stimulating canonical STING-mediated antitumor immunity should not promote  
479 further STING-mediated DNA repair.

480 **Materials and Methods**

481

482 ***Cell culture***

483 MCF7 (Estrogen Receptor-positive (ER+); Sigma Aldrich, Saint-Louis, Missouri), BT20 and HCC1937 (triple  
484 negative (TN); ATCC, Manassas, Virginia) breast cancer cell lines were purchased between 2008 and 2012.  
485 Parental (HEK-Blue™ ISG) and STING-KO (HEK-Blue™ ISG-KO-STING, Invivogen, Toulouse, France) human  
486 embryonic kidney (HEK) 293 cells were purchased in 2017. All cell lines were frozen shortly after initial  
487 expansion (3-6 passages), and thawed cells were used until passage ~20. MCF7 and BT20 were  
488 authenticated for the last time in December 2019 (STR method). Mycoplasma was tested by PCR once to  
489 twice a year. Cells were maintained in DMEM/F12 supplemented with 10% heat-inactivated FBS and 1%  
490 penicillin-streptomycin (P/S). Human breast cancer PDX-derived cell lines (HBCx-3 and HBCx-19, ER+;  
491 HBCx-2 and HBCx-39, TN) were generated from PDXs developed under IRB approval as previously  
492 described (Gaston et al. 2016).

493

494 ***Patient-derived xenografts (PDX) samples***

495 Paraffin-embedded breast cancer PDX samples (n=4) fixed in 10% neutral buffered formalin were retrieved  
496 from the archives of Xentech, Evry, France. Breast cancer PDX establishments and care and use of animals  
497 were performed as previously described (Legrier et al. 2016, Marangoni et al. 2007) after approval of the  
498 Ethics Committees of the Institut Curie and CEEA-Ile de France Paris (official registration number 59).

499

500 ***Patient samples***

501 Formalin-fixed, paraffin-embedded breast cancer samples (n=6) were retrieved from the archives of the  
502 Department of Pathology, Centre Jean Perrin, Clermont-Ferrand, France. For this study, only samples of  
503 breast tumors resistant to neoadjuvant chemotherapy (Fluorouracil-Epirubicin,Cyclophosphamide (FEC)-  
504 Taxane regimen), larger than 2 cm in diameter, were used (examples of very limited/partial response to  
505 therapy). This study was approved by the Ethics Committee (CECIC) of the Rhone-Alpes-Auvergne region  
506 (Grenoble, France).

507

508

509 **Plasmids**

510 pUNO1 (mock), pUNO1-hSTING (STING), pUNO1-hSTING-HA3x (STING-HA) and pUNO1-hSTING-MRP  
511 (STING-DN) expression plasmids were purchased from Invivogen. STING-MRP (MITA-related protein) is a  
512 spliced variant of STING lacking exon 7 that act as a dominant negative (DN) of STING when it comes to  
513 IFN induction due to the lack of binding domains to downstream effectors TBK1 and IRF-3 (1). HA-STING,  
514 Flag-STING, Flag-STING-HA and Flag-DN-STING plasmids were generated by subcloning. Plasmids were  
515 transfected into cells using Lipofectamine (ThermoFisher, Waltham, Massachusetts). Plasmids psPAX2  
516 and pMD2.G, used for lentiviral particles production, were purchased from Addgene, Watertown,  
517 Massachusetts. Lentiviral plasmids containing shRNAs targeting STING (shSTING-1 #TRCN0000161345,  
518 shSTING-2 #TRCN0000163029) or non-targeted (scrambled) shRNA (shNT #SHC016-1EA) were purchased  
519 from Sigma Aldrich. STING-IRES-GFP and DN-IRES-GFP lentiviral plasmids were generated by inserting the  
520 cDNA of STING or STING-DN, respectively, into pWPI backbone (kindly given by M. Orgunc, IUH institute).  
521 Empty pWPI lentiviral plasmid was used as a negative control (mock-IRES-GFP).

522

523 **Antibodies**

524 We used the anti-STING antibody from Cell Signaling, Danvers, Massachusetts (clone D2P2F, #13647) for  
525 the detection of full-length STING, and the anti-STING antibody from R&D Systems, Minneapolis,  
526 Minnesota (clone 723505, #MAB7169) only for detection of C-terminally truncated STING-DN by  
527 immunoblot.

528 The antibodies used in this study and their dilution for each experimental procedure (IF,  
529 immunofluorescence; IHF: immunohistofluorescence; IP, immunoprecipitation) are listed in Table 1.

530

531

**Table 1:** list of antibodies

| Name                                             | Provider                                                 | Clone               | Dilution                                              |
|--------------------------------------------------|----------------------------------------------------------|---------------------|-------------------------------------------------------|
| STING (full length)                              | Cell Signaling                                           | D2P2F               | Blot: 1/1,000<br>IF: 1/200<br>IHF : 1/50<br>IP : 1/50 |
| STING-DN (C-ter truncated)                       | R&D Systems                                              | 723505,<br>#MAB7169 | Blot: 1/1,000                                         |
| anti-Ku80                                        | Cell Signaling                                           | #2753               | Blot: 1/1,000                                         |
| anti-Ku70                                        | Santa Cruz, Dallas,<br>Texas                             | #sc-5309            | Blot: 1/1,000                                         |
| anti-DNA-PKcs                                    | Cell Signaling                                           | #12311              | Blot: 1/1,000<br>IP : 1/50                            |
| anti-calnexin                                    | Santa Cruz                                               | #sc-23954           | IF: 1/200                                             |
| anti-GM130                                       | Santa Cruz                                               | #sc-55590           | IF: 1/200                                             |
| anti-lamin A/C                                   | Cell Signaling                                           | #2032               | IF: 1/200                                             |
| lamin B1                                         | Proteintech,<br>Rosemont, Illinois                       | #12987-1-AP         | Blot: 1/1,000<br>IF: 1/200                            |
| lamin B1                                         | Santa Cruz                                               |                     | IF : 1/200<br>IHF : 1/100                             |
| PDI                                              | BD Transduction<br>Laboratories, San<br>Jose, California | #610946             | Blot : 1/1,000                                        |
| anti-actin                                       | Sigma Aldrich                                            | #A2066              | Blot: 1/1,000                                         |
| anti-phospho-H2AX (S139)                         | Cell Signaling                                           | #9718               | IF: 1/200                                             |
| 53BP1                                            | Bethyl<br>Laboratories,<br>Montgomery,<br>Texas          | #A300-272A          | IF: 1/300                                             |
| RAD51                                            | Abcam                                                    | #ab133534           | IF: 1/1,000                                           |
| anti-Flag                                        | Sigma Aldrich                                            | #1804               | Blot: 1/1,000<br>IF/EM: 1/600<br>IP: 1/100            |
| anti-HA                                          | Cell Signaling                                           | #3724               | Blot: 1/1,000<br>IF: 1/600<br>IP:1/50                 |
| Alexa Fluor 488–conjugated<br>secondary antibody | Santa Cruz                                               | #sc-362282          | IF: 1/500                                             |
| Alexa Fluor 488/594-conjugated<br>antibodies     | ThermoFisher                                             | #A11008,<br>#A21203 | IF: 1/500                                             |
| Nanogold-coupled secondary<br>antibody           | Aurio,<br>Wageningen, The<br>Netherlands                 | #100.022            | EM : 1/500                                            |
| HRP-conjugated antibodies                        | Cell Signaling                                           | #7076, #7074        | Blot: 1/5000                                          |

532

533



534 ***Generation of stable cell lines***

535 MCF7 cells stably overexpressing Flag and/or HA-tagged isoforms of STING were obtained by blasticidin  
536 selection (100 µg/mL) of cells transfected with cognate plasmids. The knockdown and rescue of STING  
537 expression in MCF7 cells were performed using the lentivirus technology. Briefly, HEK293T cells (a kind gift  
538 from Simon Fillatreau, Inserm U1151) were transfected in antibiotic-free DMEM medium with psPAX2,  
539 pMD2.G and shSTING-1, shSTING-2 or shNT plasmids. Culture medium was replaced by fresh DMEM/F12  
540 medium the day after transfection. Supernatant containing viral particles were collected 48h after  
541 transfection, centrifuged (500 g, 5 min), filtered (PES 45µm) then added onto MCF7 cells. The day after  
542 transduction, shSTING-1, shSTING-2 and shNT cells were selected with puromycin (2 µg/mL) for one week.  
543 The same procedure was used to generate the rescued cell lines: shNT cells were transduced with viruses  
544 containing mock-IRES-GFP plasmid (“shNT + mock” cells) while shSTING-2 cells were transduced with  
545 viruses containing either mock-IRES-GFP (shSTING + mock), STING-IRES-GFP (shSTING + STING) or STING-  
546 DN-IRES-GFP (shSTING + STING-DN) plasmid. Stably transduced cells were GFP-sorted by flow cytometry.

547

548 ***Transfection of siRNAs***

549 Using interferin reagent (Polyplus transfection, Illkirch-Graffenstaden, France), cells were transfected 24h  
550 post-seeding with the following siRNA (GE Dharmacon, Lafayette, Colorado): siNonTargeted (D-001810-  
551 10), siSTING (L-024333-02), siIFNAR1 (L-020209-00) and siTBK1 (L-003788-00). For siRNA efficiency, cells  
552 were analyzed 3 days post-transfection. For other experiments, cells were analyzed at least 2 days after  
553 transfection, as indicated.

554

555 ***RT-qPCR***

556 Total RNA was extracted using the NucleoSpin RNA XS kit (Macherey-Nagel, Gutenberg, France). One  
557 microgram of total RNA was reverse-transcribed into cDNA using High Capacity cDNA Reverse  
558 Transcription Kit (Applied biosystems, Foster City, California). Gene expression was analyzed with SYBR  
559 Select Master Mix (Life Technologies, Carlsbad, California). RT-qPCR data were normalized to the  
560 expression levels of housekeeping genes: GAPDH (glyceraldehyde 3-phosphate dehydrogenase) and RPL13  
561 (ribosomal protein L13).

562

563 ***Cell fractionation***

564 Sequential fractionation was adapted from a previous report (Baghirova et al. 2015). Cells were lysed (30  
565 min, 4°C) in cytoplasm-extraction buffer (50 mM Hepes, pH 7.4, 150 mM NaCl, 1% v:v NP-40) then  
566 centrifuged 5 min at 7,000 g and the supernatant (cytoplasm fraction, C) was collected. After 3 washes in  
567 same buffer, nucleus-containing pellets were resuspended and incubated (1h, 4°C) in nucleus-extraction  
568 buffer (RIPA, 2 mM MgCl<sub>2</sub> and 50 U/mL benzonase). Lysates were centrifuged 5 min at 2,000 g to remove  
569 remaining insoluble cellular debris and the supernatant (nucleus fraction, N) was recovered.

570

571 ***Chromatin fraction***

572 Chromatin fractionation was performed as previously described with minor modifications (Ochi et al.  
573 2015). Cells were pre-extracted twice (3 min on ice) with CSK buffer (10mM Hepes, 100 mM NaCl, 300 mM  
574 sucrose, 3 mM MgCl<sub>2</sub>) containing 0.7% Triton X-100 and 0.3 mg/mL RNase A. Next, cells were washed twice  
575 in ice-cold PBS then lysed (1h, 4°C) in nucleus-extraction buffer (see above). The chromatin fraction was  
576 recovered in the supernatant after centrifugation (5 min at 2,000 g). For whole cell lysates, the pre-  
577 extraction step was skipped.

578

579 ***Co-immunoprecipitation***

580 Nucleus-containing pellets (see Cell fractionation protocol) were lysed (1h, 4°C) in low-denaturing lysis  
581 buffer (50 mM Hepes pH 7.4, 50 mM Tris-HCl pH 7.4, 150 mM NaCl, 1 mM EDTA, 1% v:v Triton X100)  
582 supplemented with 2 mM MgCl<sub>2</sub> and 50 U/mL benzonase. Nuclear lysates were incubated overnight at 4°C  
583 with/without the indicated antibody then immune complexes were captured by addition of protein A/G  
584 magnetic beads (ThermoFisher) for 2h at RT. After 3 washes in low-denaturing lysis buffer, immune-  
585 complexes were denatured in LDS (4X)/β-mercaptoethanol (20%) sample buffer.

586

587 ***Immunoblotting***

588 Cell lysate protein concentration was determined using a Micro BCA Protein Assay kit (Bio Basic). Unless  
589 specified, proteins were diluted in LDS (1X)/β-mercaptoethanol (5%) sample buffer, denatured 5 min at  
590 95°C and finally loaded on NuPAGE 4-12% Bis-Tris protein gels (Life Technologies) and electro-transferred  
591 onto nitrocellulose membranes. Membranes were blocked (3% BSA, 30 min, RT), then incubated with

592 primary (overnight, 4°) and secondary (1h, RT) antibodies. Membranes were revealed with suitable HRP  
593 substrates (Clarity ECL Western Blotting Substrate, Biorad, Hercules, California and Immobilion ECL Ultra  
594 Western HRP Substrate, Merck, Darmstadt, Allemagne) and quantified by Image Lab software (Biorad)

595

#### 596 ***NanoLC-MS/MS protein identification and quantification***

597 S-Trap™ micro spin column (Protifi, Huntington, New York) digestion was performed on IP eluates  
598 according to manufacturer's protocol. Samples were digested with 2µg of trypsin (Promega, Madison,  
599 Wisconsin) at 37°C overnight. After elution, peptides were finally vacuum dried down. Samples were  
600 resuspended in 35 µL of 10% ACN, 0.1% TFA in HPLC-grade water. For each run, 5 µL was injected in a  
601 nanoRSLC-Q Exactive PLUS (RSLC Ultimate 3000) (ThermoFisher). Peptides were loaded onto a µ-  
602 precolumn (Acclaim PepMap 100 C18, cartridge, 300 µm i.d.×5 mm, 5 µm) (ThermoFisher), and were  
603 separated on a 50 cm reversed-phase liquid chromatographic column (0.075 mm ID, Acclaim PepMap 100,  
604 C18, 2 µm) (ThermoFisher). Chromatography solvents were (A) 0.1% formic acid in water, and (B) 80%  
605 acetonitrile, 0.08% formic acid. Peptides were eluted from the column with the following gradient 5% to  
606 40% B (120 minutes), 40% to 80% (1 minute). At 121 minutes, the gradient stayed at 80% for 5 minutes  
607 and, at 127 minutes, it returned to 5% to re-equilibrate the column for 20 minutes before the next  
608 injection. One blank was run between each series to prevent sample carryover. Peptides eluting from the  
609 column were analyzed by data dependent MS/MS, using top-10 acquisition method. Peptides were  
610 fragmented using higher-energy collisional dissociation (HCD). Briefly, the instrument settings were as  
611 follows: resolution was set to 70,000 for MS scans and 17,500 for the data dependent MS/MS scans in  
612 order to increase speed. The MS AGC target was set to 3.106 counts with maximum injection time set to  
613 200 ms, while MS/MS AGC target was set to 1.105 with maximum injection time set to 120 ms. The MS  
614 scan range was from 400 to 2000 m/z. Dynamic exclusion was set to 30 seconds duration.

615

#### 616 ***Data Processing Following LC-MS/MS acquisition***

617 The MS files were processed with the MaxQuant software version 1.5.8.3 and searched with Andromeda  
618 search engine against the database of Homo Sapiens from swissprot 07/2017. To search parent mass and  
619 fragment ions, we set an initial mass deviation of 4.5 ppm and 20 ppm respectively. The minimum peptide  
620 length was set to 7 aminoacids and strict specificity for trypsin cleavage was required, allowing up to two  
621 missed cleavage sites. Carbamidomethylation (Cys) was set as fixed modification, whereas oxidation (Met)

622 and N-term acetylation were set as variable modifications. Match between runs was not allowed. LFQ  
623 minimum ratio count was set to 1. The false discovery rates (FDRs) at the protein and peptide level were  
624 set to 1%. Scores were calculated in MaxQuant as described previously (Cox J., Mann M., 2008). The  
625 reverse and common contaminants hits were removed from MaxQuant output. Proteins were quantified  
626 according to the MaxQuant label-free algorithm using LFQ intensities [Luber, 2010 #1907; Cox, 2008  
627 #1906]. Samples were analysed in triplicates and data were analyzed with Perseus software (version  
628 1.6.2.3) freely available at [www.perseus-framework.org](http://www.perseus-framework.org). The LFQ (Label-free Quantification) data were  
629 transformed in log2. All the proteins identified in all of the 3 replicates were submitted to statistical test  
630 (volcano plot, FDR=0.001 and S0=0.5) after imputation of the missing value by a Gaussian distribution of  
631 random numbers using default settings. Protein annotations (GO, Keywords) were retrieved directly using  
632 via perseus.

633

#### 634 ***Immunofluorescence***

635 For immunohistofluorescence experiments, formalin-fixed paraffin-embedded samples underwent  
636 deparaffination and rehydration followed by heat-induced antigen retrieval in citrate buffer (pH 6). For  
637 immunocytofluorescence experiments, cells were grown in sterile chamber slides (#80826, IBIDI,  
638 Gräfelfing, Germany), treated as indicated, then fixed in 4% paraformaldehyde and permeabilized in 0.1%  
639 Triton X100. Both types of samples were then blocked with 3% Bovine Serum Albumin/2% normal goat  
640 serum before overnight incubation at 4°C with primary antibodies and 1h incubation at RT with fluorescent  
641 secondary antibodies. Nuclei were stained with DAPI (1µg/mL) for 10 min at RT (ThermoFisher).  
642 Acquisition was performed using an Apotome Zeiss at 10X (comet assays), 20X (immunohistofluorescence  
643 and 53BP1 foci) and 63X (co-localization assays) magnification. Merged images were treated by Image J  
644 software to emphasize co-localization (appearing in white).

645

#### 646 ***Electron microscopy***

647 Cells collected in 1,5 mL Eppendorf tube were fixed, permeabilized and blocked as for  
648 immunofluorescence analyses. Cells were incubated overnight (4°C) with/without anti-Flag antibody then  
649 incubated (1h at RT) with nanogold-coupled secondary antibody and finally fixed with 2.5% glutaraldehyde  
650 EM grade (Sigma Aldrich, #16210) for 1 h. Sample were post-fixed with 1% osmium tetroxide (EMS) in 0.1  
651 M phosphate buffer then gradually dehydrated in 70, 90 and 100% ethanol. After 10 min in a 1:2 mixture

652 of epoxy propane and epoxy resin and 10 min in epon, samples were embedded in epoxy resin and  
653 polymerized at 60°C for 24 h. After polymerization, ultrathin sections (90 nm) were cut with an ultra-  
654 microtome (Reichert ultracut S) on 100 mesh grids (Gilder), stained with uranyl acetate and Reynold's lead  
655 and observed with a transmission electron microscope (JEOL 1011). Acquisition was performed with a  
656 Gatan Orius 1000 CCD camera.

657

#### 658 ***Comet assay***

659 MCF7 cells were treated with mafosfamide (10 $\mu$ M) one day post-seeding and maintained for another 6  
660 days which corresponds to maximal  $\gamma$ H2AX accumulation (Gaston et al. 2016). When relevant, cells were  
661 transfected with expression plasmids 8h prior treatment. Naïve HEK293 cells were transfected one day  
662 post-seeding with either mock or STING plasmids (as indicated) and maintained for 3 days. Comet assays  
663 were performed according to the manufacturer's instructions (4250-050-K; Trevigen, Gaithersburg,  
664 Maryland). DNA damage was measured in terms of tail moments using OpenComet plugin in ImageJ  
665 software.

666

#### 667 ***Cell viability assay***

668 Cells were treated with vehicle, mafosfamide or etoposide (10 $\mu$ M or as indicated) one day post-seeding.  
669 In the siRNA/genotoxic combination setting, cells were transfected one day post-seeding and treated with  
670 mafosfamide 3 days later. Cell viability was measured using CellTiter-Glo Luminescent cell viability assay  
671 reagent. Luminescence was measured with a microplate reader (Mithras LB940, Berthold, Bad Wildbad,  
672 Germany) and data were normalized to the vehicle and/or non-targeted siRNA/shRNA (siNT/shNT)  
673 condition as indicated.

674

#### 675 ***Colony assay***

676 MCF7 cells were treated with 10 $\mu$ M mafosfamide one day post-seeding. BT20 cells were transfected with  
677 siRNAs one day post-seeding and treated with 10 $\mu$ M mafosfamide 3 days later. When indicated, cells were  
678 transfected with expression plasmids the day of treatment. After 20 or 40 days, colonies were stained and  
679 quantified using the plugin ColonyArea in ImageJ software.

680

681 ***Statistical analysis***

682 Data were analyzed using GraphPad Prism 6 software (GraphPad, San Diego, California) and are presented  
683 as mean +/- s.d. unless otherwise indicated. For comparison between two groups two-tailed Student's t-  
684 test was used while comparisons between multiple groups were performed using one-way ANOVA. To  
685 examine the influence of two independent parameters on multiple groups two-way ANOVA was used.  
686 Statistically significant differences are indicated as follows: \*p < 0.05; \*\*p < 0.01; \*\*\*p < 0.001; \*\*\*\*p <  
687 0.0001. Each experiment was repeated independently three times unless otherwise indicated. Statistical  
688 details of experiments can be found in the figure legends.

689 **Acknowledgements**

690 This study was funded by XenTech, annual funding from Inserm and the University Paris Descartes and  
691 ECLER non-profit association. JG and LC were recipient of a CIFRE fellowship from the Association Nationale  
692 de la Recherche et de la Technologie (ANRT). MM is supported by the French National League against  
693 Cancer.

694 The authors would like to thank Nicolas Goudin for helpful assistance with imaging, and the electron  
695 microscopy facility of Hôpital Cochin. We are grateful to Patrice Codogno, Etienne Morel, Ganna Panasyuk,  
696 Thierry Dubois and Frédéric Rieux-Laucat for helpful discussions, to Dr Orgunc and Pr S. Fillatreau for  
697 providing biological materials, and to Katheryn Meek for critical reading of the manuscript.

698

699 **Author Contributions:**

700 Conception and design: L. Cheradame, J. Gaston, S. Cairo, V. Goffin

701 Development of methodology: L. Cheradame, I. C. Guerrero, A. Schmitt, S. Cairo, V. Goffin

702 Acquisition of data: L. Cheradame, I. C. Guerrero, A. Schmitt, V. Jung, M. Pouillard

703 Analysis and interpretation of data: L. Cheradame, I. C. Guerrero, A. Schmitt, N. Radosevic-Robin, M.

704 Modesti, S. Cairo, V. Goffin

705 Writing, review, and/or revision of the manuscript: L. Cheradame, I. C. Guerrero, A. Schmitt, M. Modesti,

706 J.-G. Judde, S. Cairo, V. Goffin

707 Administrative, technical, or material support: L. Cheradame, I. C. Guerrero, A. Schmitt, V. Jung, N.

708 Radosevic-Robin, J.-G. Judde, S. Cairo, V. Goffin

709 Study supervision: S. Cairo, V. Goffin

710

711 **Declaration of Interests:** The authors declare no conflict of interest.

712



713 **Supplemental Information**

714

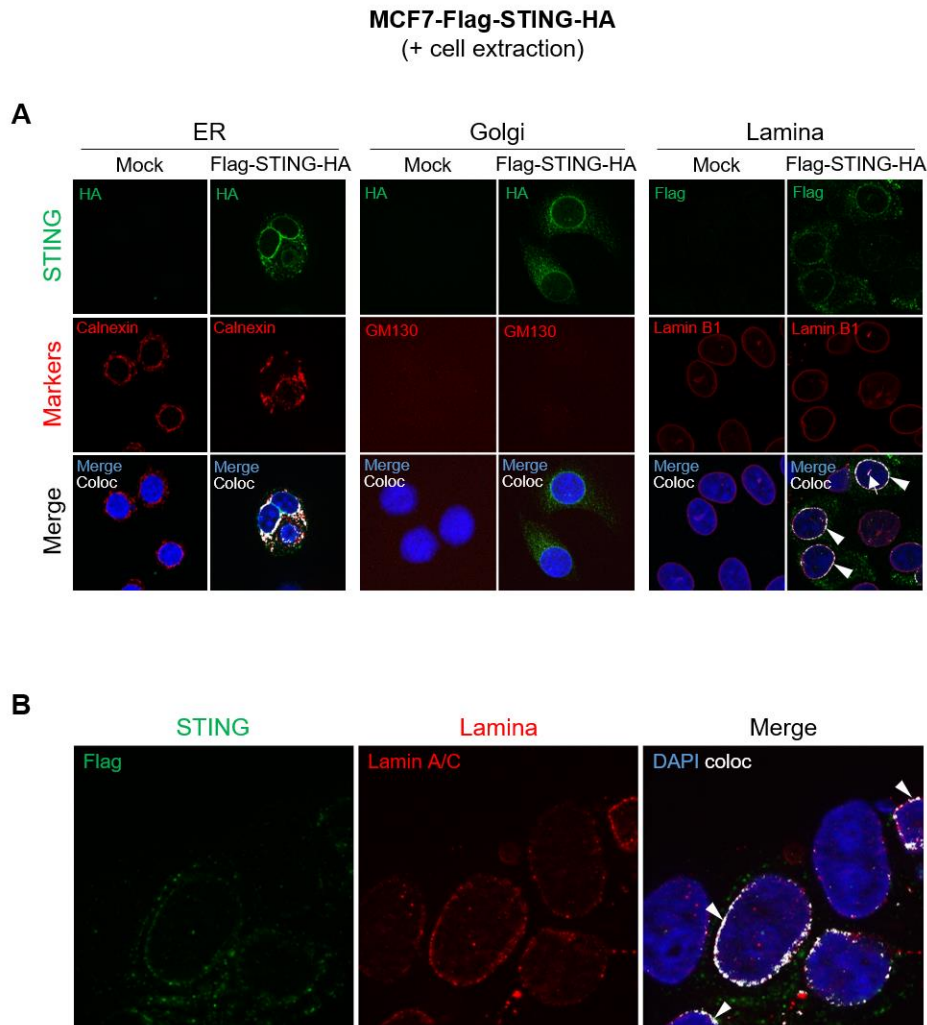

715

716

717 **Fig S1. Nuclear STING co-localizes with the lamina in breast cancer cells. a,b** The same experiment as in main Fig2a  
718 was performed after pre-extraction treatment of MCF7 cells ectopically expressing Flag-STING-HA *versus* empty  
719 vector (Mock). STING was stained using anti-HA or anti-Flag antibodies (according to the species of the antibody  
720 directed against subcellular markers) as indicated. Middle panels show immunofluorescence of ER (calnexin), Golgi  
721 (GM130) and nuclear lamina (lamin B1) markers in **a**, and of lamin A/C in **b**. Lower (**a**) and right (**b**) panels display  
722 merged images. Nuclei were stained with DAPI. White arrowheads point to co-localization of STING at the lamina  
723 rim, and white arrows to intra-nuclear staining.

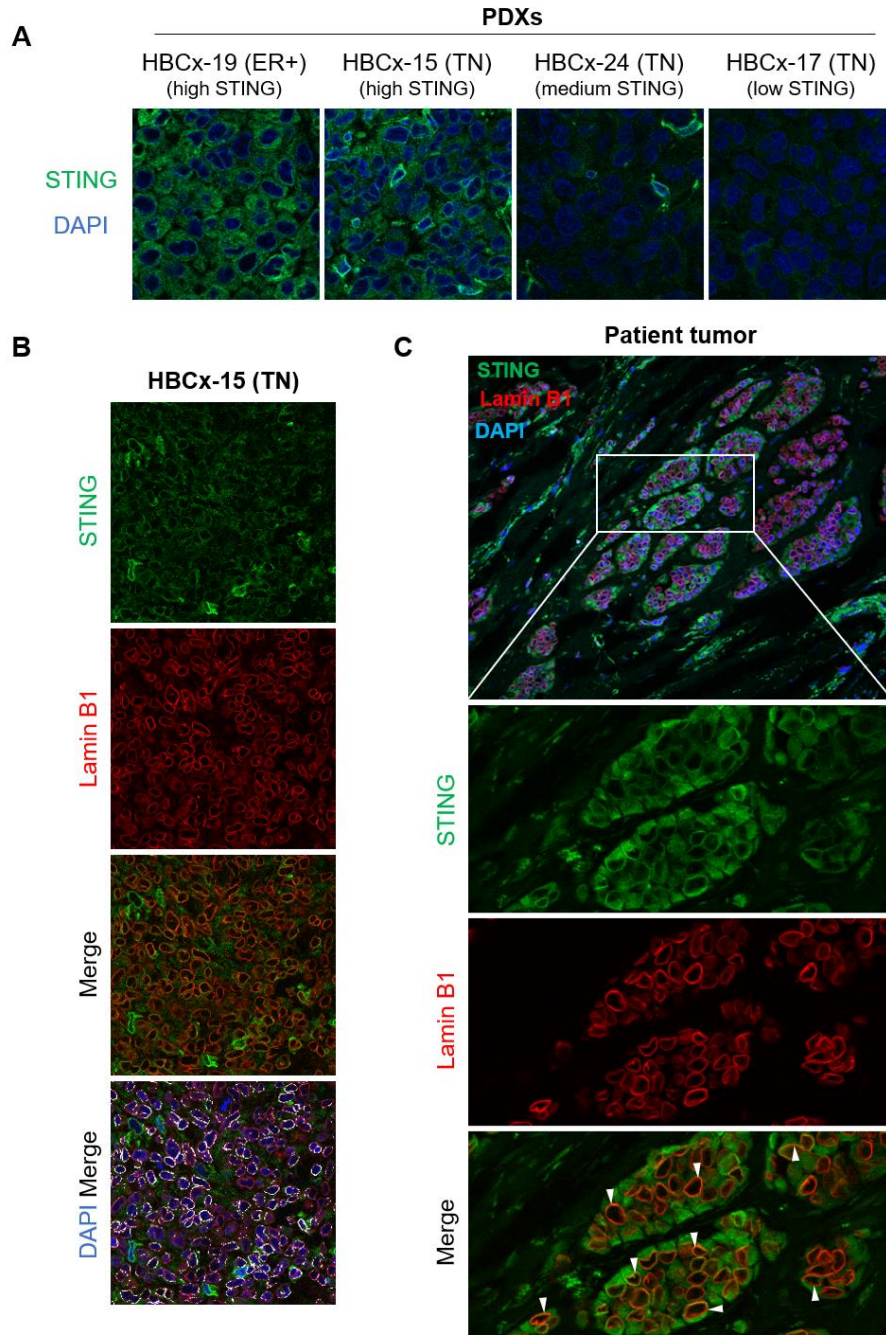

724

725 **Fig S2. Nuclear STING co-localizes with the lamina in breast cancer cells PDXs and patient breast tumors.** **a** Examples  
726 of endogenous STING immunostaining in ER+ and TN breast cancer PDXs exhibiting different levels of STING as  
727 determined by transcriptomic analysis (high, medium, low). **b** Immunofluorescence of endogenous STING and lamin  
728 B1 in the high STING-expressing HBCx-15 PDX. Lower panels display merged images with or without DAPI and image  
729 treatment by Image J software to emphasize co-localization (appearing in white). **c** The upper image shows one  
730 representative patient tumor area immunostained for STING and lamin B1 (nuclei stained with DAPI). The three  
731 bottom panels show higher magnification of the squared area for STING, lamin B1 and merged staining, as indicated.  
732 White arrowheads: examples of STING/lamin B1 co-localization.

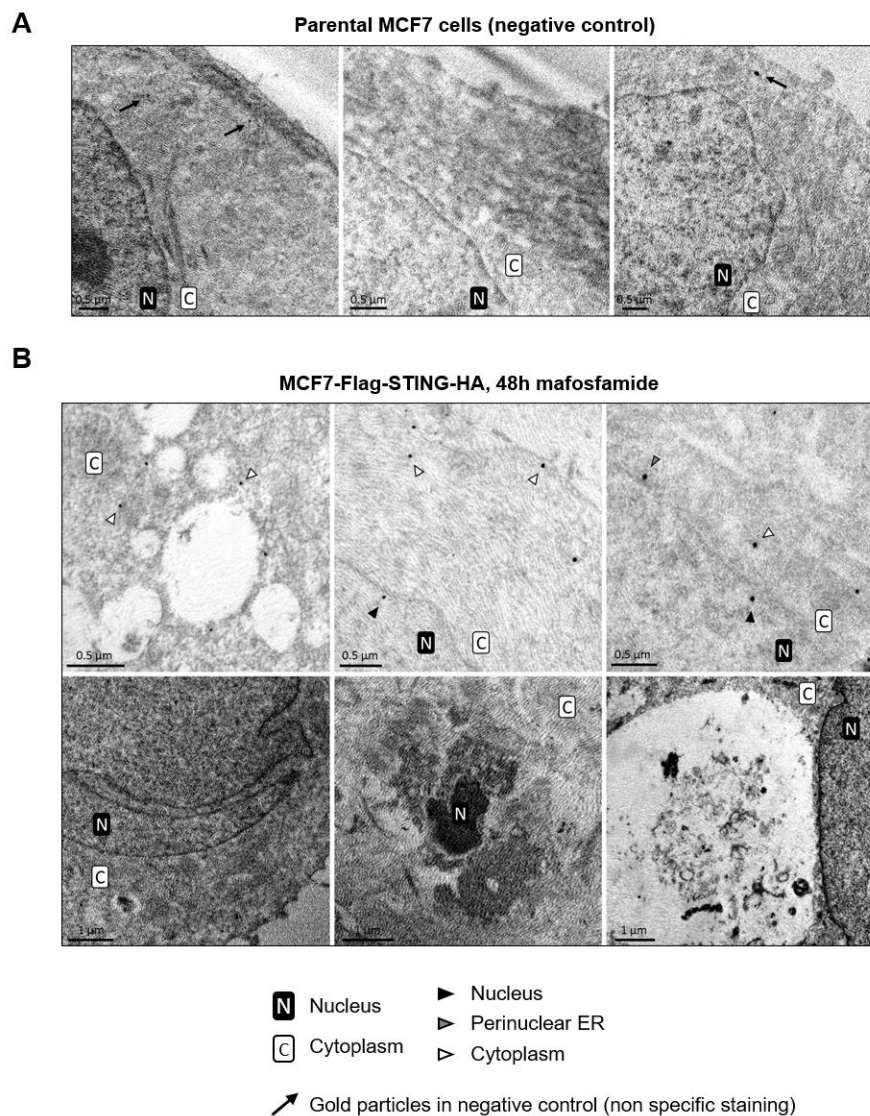

733

734

735 **Fig S3. Localization of STING as assessed by immunoelectron microscopy.** **a** Representative images of parental MCF7  
736 cells stained with anti-flag immunogold labeling procedure used as the negative control of experiments shown in Fig.  
737 3. Black arrows indicate minimal non-specific nanogold staining. **b** Six representative images of MCF7 cells expressing  
738 Flag-STING-HA after mafosfamide treatment (48h). Upper panels: anti-flag immunogold staining showing STING-  
739 positive vesicles (left) and STING present at both sides of the nuclear membrane (middle and right). Lower panels:  
740 mafosfamide-treated cells displayed several signs of stress including nuclei with irregular shape and large  
741 invaginations, picnotic nuclei, dilated ER with dramatically enlarged lumen and large vesicles filled with cell debris.  
742 STING subcellular localization is identified using symbols displayed below the figure. Size bars are indicated in each  
743 panel.

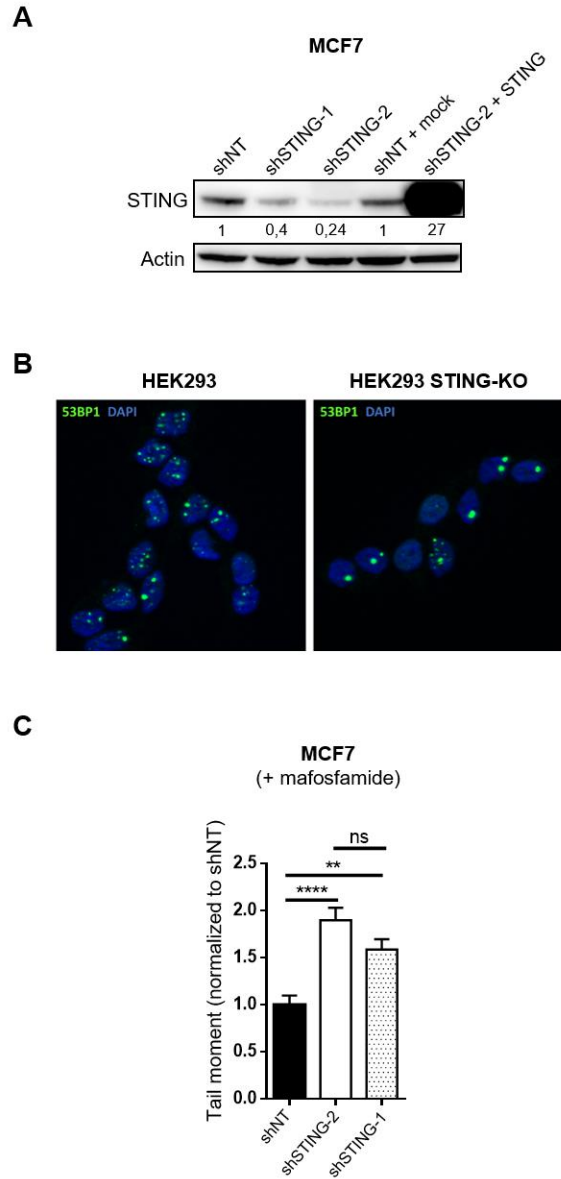

744

745

746 **Fig S4. STING contributes to the DDR.** **a** Immunoblot of STING in MCF7 cells stably transduced with either non-  
747 targeted shRNA (shNT) or two different shRNAs targeting *STING* (shSTING-1 and shSTING-2) and rescued using STING-  
748 encoding *versus* empty vectors (mock), as indicated. **b** Immunofluorescence of 53BP1 foci in naïve parental (WT) and  
749 STING-deficient (KO) HEK293 cells. Nuclei were stained with DAPI. Quantification is shown in main Fig 4c. **c** Tail  
750 moment after mafosfamide treatment of MCF7 cells stably transduced with shNT or two different shRNAs targeting  
751 *STING* (shSTING-2 and shSTING-1). Mean  $\pm$  s.e.m of tail moment of n=746 (shNT), n=976 (shSTING-2) and n= 1,084  
752 (shSTING-1) cells from n=3 independent experiments (one-way ANOVA and post-hoc Tukey's multiple comparison  
753 test).



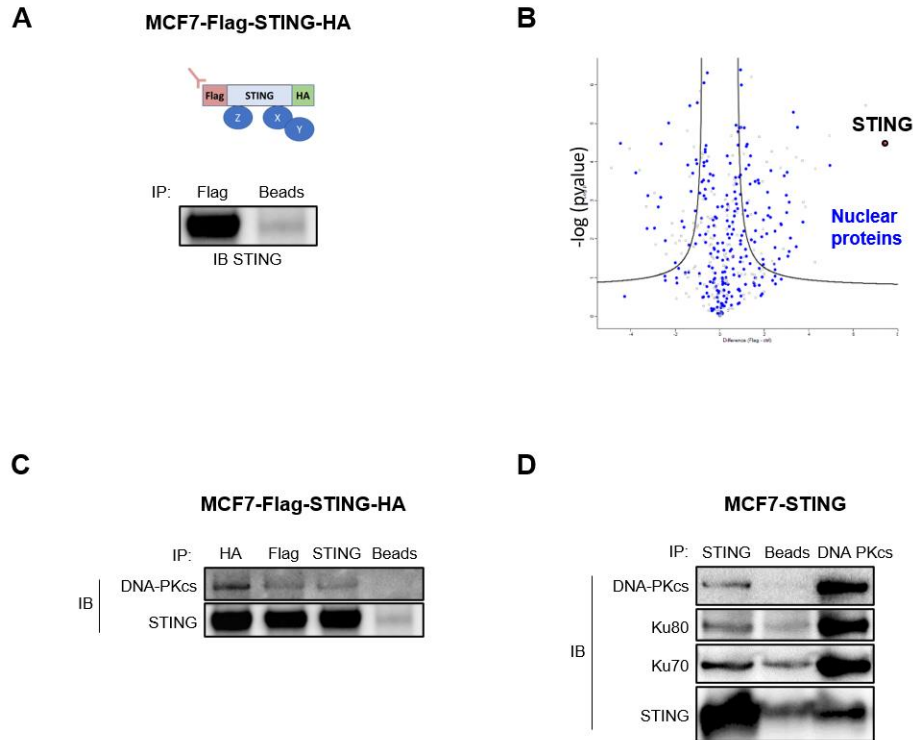

754

755

756 **Fig S5. Nuclear STING interactome by mass spectrometry**

757 **a** Immunoblot of STING following Flag-STING-HA immunoprecipitation from nuclear extracts of stably transfected  
758 MCF7 cells using anti-Flag antibodies or beads only (negative control). **b** Volcano plot of  $-\log(pvalue)$  versus fold  
759 change of proteins present in anti-STING immunoprecipitates versus negative control as detected by mass  
760 spectrometry. Nuclear proteins (Gene Ontology Cell Component GOCC and Keywords of Uniprot databases) are  
761 colored in blue. **c** Immunoblots (IB) of DNA-PKcs in immunoprecipitates recovered using three antibodies mapping  
762 distinct regions of Flag-STING-HA ectopically expressed in MCF7 cells. **d** Immunoblots of proteins constituting the  
763 DNA-PK complex (DNA-PKcs, Ku80, Ku70) in immunoprecipitates of untagged STING ectopically expressed in MCF7  
764 cells. The reverse immunoprecipitation was performed using anti-DNA-PKcs antibody (right lane). In **c-d**, the negative  
765 control involved beads only.

766

767

768

769

770

771

772

773 **Supplementary Table 1** (provided as a separate excel file).

774 **Protein partners of nuclear STING (TMEM173)**

775 List of protein identified after immunoprecipitation of STING using anti-Flag antibody (Fla1 to 3) and  
776 negative control (ctrl1 to 3). For each protein we report the log(2) of the LFQ values. Values in grey are  
777 imputed values as described in material and method section, as these proteins were not identified and/or  
778 quantified in that samples. The t-test was performed between the “ctrl” and “Flag” after imputation of the  
779 missing values. Protein identified with a FDR=0.001, S0=0.5 are marked as + . In green, we highlight the  
780 proteins significantly higher in the Flag samples. Proteins classified as “Nucleus” in GOCC and Keywords of  
781 Uniprot are reported in light blue (as in Figure S5b). In red, proteins belonging to the DNA repair as  
782 highlighted in Figure 7b.

783



## 784 References

- 785 Ablasser, A., M. Goldeck, T. Cavlar, T. Deimling, G. Witte, I. Rohl, K. P. Hopfner, J. Ludwig, and V.  
786 Hornung. 2013. "cGAS produces a 2'-5'-linked cyclic dinucleotide second messenger that  
787 activates STING." *Nature* 498 (7454):380-4. doi: 10.1038/nature12306.
- 788 Ahn, J., T. Xia, H. Konno, K. Konno, P. Ruiz, and G. N. Barber. 2014. "Inflammation-driven carcinogenesis  
789 is mediated through STING." *Nat Commun* 5:5166. doi: 10.1038/ncomms6166.
- 790 Baghirova, S., B. G. Hughes, M. J. Hendzel, and R. Schulz. 2015. "Sequential fractionation and isolation of  
791 subcellular proteins from tissue or cultured cells." *MethodsX* 2:440-5. doi:  
792 10.1016/j.mex.2015.11.001.
- 793 Bakhom, S. F., B. Ngo, A. M. Laughney, J. A. Cavallo, C. J. Murphy, P. Ly, P. Shah, R. K. Sriram, T. B. K.  
794 Watkins, N. K. Taunk, M. Duran, C. Pauli, C. Shaw, K. Chadalavada, V. K. Rajasekhar, G. Genovese,  
795 S. Venkatesan, N. J. Birkbak, N. McGranahan, M. Lundquist, Q. LaPlant, J. H. Healey, O. Elemento,  
796 C. H. Chung, N. Y. Lee, M. Imielenski, G. Nanjangud, D. Pe'er, D. W. Cleveland, S. N. Powell, J.  
797 Lammerding, C. Swanton, and L. C. Cantley. 2018. "Chromosomal instability drives metastasis  
798 through a cytosolic DNA response." *Nature* 553 (7689):467-472. doi: 10.1038/nature25432.
- 799 Barber, G. N. 2015. "STING: infection, inflammation and cancer." *Nat Rev Immunol* 15 (12):760-70. doi:  
800 10.1038/nri3921.
- 801 Bengtsson, L., and H. Otto. 2008. "LUMA interacts with emerin and influences its distribution at the inner  
802 nuclear membrane." *J Cell Sci* 121 (Pt 4):536-48. doi: 10.1242/jcs.019281.
- 803 Blackford, A. N., and S. P. Jackson. 2017. "ATM, ATR, and DNA-PK: The Trinity at the Heart of the DNA  
804 Damage Response." *Mol Cell* 66 (6):801-817. doi: 10.1016/j.molcel.2017.05.015.
- 805 Bouwman, P., and J. Jonkers. 2012. "The effects of deregulated DNA damage signalling on cancer  
806 chemotherapy response and resistance." *Nat Rev Cancer* 12 (9):587-98. doi: 10.1038/nrc3342.
- 807 Britton, S., J. Coates, and S. P. Jackson. 2013. "A new method for high-resolution imaging of Ku foci to  
808 decipher mechanisms of DNA double-strand break repair." *J Cell Biol* 202 (3):579-95. doi:  
809 10.1083/jcb.201303073.
- 810 Burleigh, K., J. H. Maltbaek, S. Cambier, R. Green, M. Gale, Jr., R. C. James, and D. B. Stetson. 2020.  
811 "Human DNA-PK activates a STING-independent DNA sensing pathway." *Sci Immunol* 5 (43). doi:  
812 10.1126/sciimmunol.aba4219.
- 813 Calkins, A. S., J. D. Iglehart, and J. B. Lazaro. 2013. "DNA damage-induced inhibition of rRNA synthesis by  
814 DNA-PK and PARP-1." *Nucleic Acids Res* 41 (15):7378-86. doi: 10.1093/nar/gkt502.
- 815 Chen, H., R. Pei, W. Zhu, R. Zeng, Y. Wang, Y. Wang, M. Lu, and X. Chen. 2014. "An alternative splicing  
816 isoform of MITA antagonizes MITA-mediated induction of type I IFNs." *J Immunol* 192 (3):1162-  
817 70. doi: 10.4049/jimmunol.1300798.
- 818 Chen, H., H. Sun, F. You, W. Sun, X. Zhou, L. Chen, J. Yang, Y. Wang, H. Tang, Y. Guan, W. Xia, J. Gu, H.  
819 Ishikawa, D. Gutman, G. Barber, Z. Qin, and Z. Jiang. 2011. "Activation of STAT6 by STING is  
820 critical for antiviral innate immunity." *Cell* 147 (2):436-46. doi: 10.1016/j.cell.2011.09.022.
- 821 Chung, D. K., J. N. Chan, J. Strecker, W. Zhang, S. Ebrahimi-Ardebili, T. Lu, K. J. Abraham, D. Durocher, and  
822 K. Mekhail. 2015. "Perinuclear tethers license telomeric DSBs for a broad kinesin- and NPC-  
823 dependent DNA repair process." *Nat Commun* 6:7742. doi: 10.1038/ncomms8742.
- 824 Clarke, T. L., M. P. Sanchez-Bailon, K. Chiang, J. J. Reynolds, J. Herrero-Ruiz, T. M. Bandejas, P. M. Matias,  
825 S. L. Maslen, J. M. Skehel, G. S. Stewart, and C. C. Davies. 2017. "PRMT5-Dependent Methylation  
826 of the TIP60 Coactivator RUVBL1 Is a Key Regulator of Homologous Recombination." *Mol Cell* 65  
827 (5):900-916 e7. doi: 10.1016/j.molcel.2017.01.019.
- 828 Deng, L., H. Liang, M. Xu, X. Yang, B. Burnette, A. Arina, X.D. Li, H. Mauceri, M. Beckett, T. Darga, X.  
829 Huang, T.F. Gajewski, Z.J. Chen, Y.X. Fu, and R.R. Weichselbaum. 2014. "STING-Dependent

- 830 Cytosolic DNA Sensing Promotes Radiation-Induced Type I Interferon-Dependent Antitumor  
831 Immunity in Immunogenic Tumors." *Immunity* 41 (5):843-852.
- 832 Dobrzynska, A., S. Gonzalo, C. Shanahan, and P. Askjaer. 2016. "The nuclear lamina in health and  
833 disease." *Nucleus* 7 (3):233-48. doi: 10.1080/19491034.2016.1183848.
- 834 Erdal, E., S. Haider, J. Rehwinkel, A. L. Harris, and P. J. McHugh. 2017. "A prosurvival DNA damage-  
835 induced cytoplasmic interferon response is mediated by end resection factors and is limited by  
836 Trex1." *Genes Dev* 31 (4):353-369. doi: 10.1101/gad.289769.116.
- 837 Ferguson, B. J., D. S. Mansur, N. E. Peters, H. Ren, and G. L. Smith. 2012. "DNA-PK is a DNA sensor for IRF-  
838 3-dependent innate immunity." *Elife* 1:e00047. doi: 10.7554/eLife.00047.
- 839 Franz, K. M., W. J. Neidermyer, Y. J. Tan, S. P. J. Whelan, and J. C. Kagan. 2018. "STING-dependent  
840 translation inhibition restricts RNA virus replication." *Proc Natl Acad Sci U S A* 115 (9):E2058-  
841 E2067. doi: 10.1073/pnas.1716937115.
- 842 Gaston, J., L. Cheradame, V. Yvonnet, O. Deas, M. F. Poupon, J. G. Judde, S. Cairo, and V. Goffin. 2016.  
843 "Intracellular STING inactivation sensitizes breast cancer cells to genotoxic agents." *Oncotarget*  
844 7 (47):77205-77224. doi: 10.18632/oncotarget.12858.
- 845 Gaston, J., L. Cheradame, V. Yvonnet, O. Deas, M. F. Poupon, J. G. Judde, S. Cairo, and V. Goffin. 2019.  
846 "Correction: Intracellular STING inactivation sensitizes breast cancer cells to genotoxic agents."  
847 *Oncotarget* 10 (41):4249-4251. doi: 10.18632/oncotarget.27042.
- 848 Gonugunta, V. K., T. Sakai, V. Pokatayev, K. Yang, J. Wu, N. Dobbs, and N. Yan. 2017. "Trafficking-  
849 Mediated STING Degradation Requires Sorting to Acidified Endolysosomes and Can Be Targeted  
850 to Enhance Anti-tumor Response." *Cell Rep* 21 (11):3234-3242. doi:  
851 10.1016/j.celrep.2017.11.061.
- 852 Goodwin, J. F., and K. E. Knudsen. 2014. "Beyond DNA repair: DNA-PK function in cancer." *Cancer Discov*  
853 4 (10):1126-39. doi: 10.1158/2159-8290.CD-14-0358.
- 854 Harding, S. M., J. L. Benci, J. Irianto, D. E. Discher, A. J. Minn, and R. A. Greenberg. 2017. "Mitotic  
855 progression following DNA damage enables pattern recognition within micronuclei." *Nature* 548  
856 (7668):466-470. doi: 10.1038/nature23470.
- 857 Hosoya, N., and K. Miyagawa. 2014. "Targeting DNA damage response in cancer therapy." *Cancer Sci* 105  
858 (4):370-88. doi: 10.1111/cas.12366.
- 859 Ishikawa, H., and G. N. Barber. 2008. "STING is an endoplasmic reticulum adaptor that facilitates innate  
860 immune signalling." *Nature* 455 (7213):674-8. doi: 10.1038/nature07317.
- 861 Ishikawa, H., Z. Ma, and G.N. Barber. 2009. "STING regulates intracellular DNA-mediated, type I  
862 interferon-dependent innate immunity." *Nature* 461 (7265):788-792.
- 863 Jackson, S. P., and J. Bartek. 2009. "The DNA-damage response in human biology and disease." *Nature*  
864 461 (7267):1071-8. doi: 10.1038/nature08467.
- 865 Jacquet, K., A. Fradet-Turcotte, N. Avvakumov, J. P. Lambert, C. Roques, R. K. Pandita, E. Paquet, P. Herst,  
866 A. C. Gingras, T. K. Pandita, G. Legube, Y. Doyon, D. Durocher, and J. Cote. 2016. "The TIP60  
867 Complex Regulates Bivalent Chromatin Recognition by 53BP1 through Direct H4K20me Binding  
868 and H2AK15 Acetylation." *Mol Cell* 62 (3):409-421. doi: 10.1016/j.molcel.2016.03.031.
- 869 Katta, S. S., C. J. Smoyer, and S. L. Jaspersen. 2014. "Destination: inner nuclear membrane." *Trends Cell*  
870 *Biol* 24 (4):221-9. doi: 10.1016/j.tcb.2013.10.006.
- 871 King, M. C., C. P. Lusk, and G. Blobel. 2006. "Karyopherin-mediated import of integral inner nuclear  
872 membrane proteins." *Nature* 442 (7106):1003-7. doi: 10.1038/nature05075.
- 873 Kondo, N., A. Takahashi, K. Ono, and T. Ohnishi. 2010. "DNA damage induced by alkylating agents and  
874 repair pathways." *J Nucleic Acids* 2010:543531. doi: 10.4061/2010/543531.
- 875 Kondo, T., J. Kobayashi, T. Saitoh, K. Maruyama, K.J. Ishii, G.N. Barber, K. Komatsu, S. Akira, and T. Kawai.  
876 2013. "DNA damage sensor MRE11 recognizes cytosolic double-stranded DNA and induces type I  
877 interferon by regulating STING trafficking." *Proc. Natl. Acad. Sci. U. S. A* 110 (8):2969-2974.

- 878 Kosugi, S., M. Hasebe, M. Tomita, and H. Yanagawa. 2009. "Systematic identification of cell cycle-  
879 dependent yeast nucleocytoplasmic shuttling proteins by prediction of composite motifs." *Proc*  
880 *Natl Acad Sci U S A* 106 (25):10171-6. doi: 10.1073/pnas.0900604106.
- 881 Lan, Y. Y., D. Londono, R. Bouley, M. S. Rooney, and N. Hacohen. 2014. "Dnase2a deficiency uncovers  
882 lysosomal clearance of damaged nuclear DNA via autophagy." *Cell Rep* 9 (1):180-192. doi:  
883 10.1016/j.celrep.2014.08.074.
- 884 Lans, H., J. A. Marteiijn, and W. Vermeulen. 2012. "ATP-dependent chromatin remodeling in the DNA-  
885 damage response." *Epigenetics Chromatin* 5:4. doi: 10.1186/1756-8935-5-4.
- 886 Legrier, M. E., I. Bieche, J. Gaston, A. Beurdeley, V. Yvonnet, O. Deas, A. Thuleau, S. Chateau-Joubert, J. L.  
887 Servely, S. Vacher, M. Lassalle, S. Depil, C. Tucker G, J. J. Fontaine, M. F. Poupon, S. Roman-  
888 Roman, J. G. Judde, D. Decaudin, S. Cairo, and E. Marangoni. 2016. "Activation of IFN/STAT1  
889 signalling predicts response to chemotherapy in oestrogen receptor-negative breast cancer." *Br*  
890 *J Cancer* 114 (2):177-87. doi: 10.1038/bjc.2015.398.
- 891 Lemaitre, C., A. Grabarz, K. Tsouroula, L. Andronov, A. Furst, T. Pankotai, V. Heyer, M. Rogier, K. M.  
892 Attwood, P. Kessler, G. Dellaire, B. Klaholz, B. Reina-San-Martin, and E. Soutoglou. 2014.  
893 "Nuclear position dictates DNA repair pathway choice." *Genes Dev* 28 (22):2450-63. doi:  
894 10.1101/gad.248369.114.
- 895 Li, T., and Z. J. Chen. 2018. "The cGAS-cGAMP-STING pathway connects DNA damage to inflammation,  
896 senescence, and cancer." *J Exp Med* 215 (5):1287-1299. doi: 10.1084/jem.20180139.
- 897 Liu, H., H. Zhang, X. Wu, D. Ma, J. Wu, L. Wang, Y. Jiang, Y. Fei, C. Zhu, R. Tan, P. Jungblut, G. Pei, A.  
898 Dorhoi, Q. Yan, F. Zhang, R. Zheng, S. Liu, H. Liang, Z. Liu, H. Yang, J. Chen, P. Wang, T. Tang, W.  
899 Peng, Z. Hu, Z. Xu, X. Huang, J. Wang, H. Li, Y. Zhou, F. Liu, D. Yan, S. H. E. Kaufmann, C. Chen, Z.  
900 Mao, and B. Ge. 2018. "Nuclear cGAS suppresses DNA repair and promotes tumorigenesis."  
901 *Nature* 563 (7729):131-136. doi: 10.1038/s41586-018-0629-6.
- 902 Liu, S., X. Cai, J. Wu, Q. Cong, X. Chen, T. Li, F. Du, J. Ren, Y. T. Wu, N. V. Grishin, and Z. J. Chen. 2015.  
903 "Phosphorylation of innate immune adaptor proteins MAVS, STING, and TRIF induces IRF3  
904 activation." *Science* 347 (6227):aaa2630. doi: 10.1126/science.aaa2630.
- 905 Liu, S., S. O. Opiyo, K. Manthey, J. G. Glanzer, A. K. Ashley, C. Amerin, K. Troksa, M. Shrivastav, J. A.  
906 Nickoloff, and G. G. Oakley. 2012. "Distinct roles for DNA-PK, ATM and ATR in RPA  
907 phosphorylation and checkpoint activation in response to replication stress." *Nucleic Acids Res*  
908 40 (21):10780-94. doi: 10.1093/nar/gks849.
- 909 Mackenzie, K. J., P. Carroll, C. A. Martin, O. Murina, A. Fluteau, D. J. Simpson, N. Olova, H. Sutcliffe, J. K.  
910 Rainger, A. Leitch, R. T. Osborn, A. P. Wheeler, M. Nowotny, N. Gilbert, T. Chandra, M. A. M.  
911 Reijns, and A. P. Jackson. 2017. "cGAS surveillance of micronuclei links genome instability to  
912 innate immunity." *Nature* 548 (7668):461-465. doi: 10.1038/nature23449.
- 913 Malik, P., N. Korfali, V. Srsen, V. Lazou, D. G. Batrakou, N. Zuleger, D. M. Kavanagh, G. S. Wilkie, M. W.  
914 Goldberg, and E. C. Schirmer. 2010. "Cell-specific and lamin-dependent targeting of novel  
915 transmembrane proteins in the nuclear envelope." *Cell Mol Life Sci* 67 (8):1353-69. doi:  
916 10.1007/s00018-010-0257-2.
- 917 Malik, P., N. Zuleger, J.I. las Heras, N. Saiz-Ros, A.A. Makarov, V. Lazou, P. Meinke, M. Waterfall, D.A.  
918 Kelly, and E.C. Schirmer. 2014. "NET23/STING promotes chromatin compaction from the nuclear  
919 envelope." *PLoS ONE* 9 (11):e111851.
- 920 Marangoni, E., A. Vincent-Salomon, N. Auger, A. Degeorges, F. Assayag, P. de Cremoux, L. de Plater, C.  
921 Guyader, G. de Pinieux, J.G. Judde, M. Rebucci, C. Tran-Perennou, X. Sastre-Garau, B. Sigal-  
922 Zafrani, O. Delattre, V. Dieras, and M.F. Poupon. 2007. "A new model of patient tumor-derived  
923 breast cancer xenografts for preclinical assays." *Clin. Cancer Res* 13 (13):3989-3998.
- 924 Marnef, A., and G. Legube. 2017. "Organizing DNA repair in the nucleus: DSBs hit the road." *Curr Opin*  
925 *Cell Biol* 46:1-8. doi: 10.1016/j.ceb.2016.12.003.

- 926 Mazur, L., M. Opydo-Chanek, M. Stojak, and K. Wojcieszek. 2012. "Mafosfamide as a new anticancer  
927 agent: preclinical investigations and clinical trials." *Anticancer Res* 32 (7):2783-9.
- 928 Mohiuddin, I. S., and M. H. Kang. 2019. "DNA-PK as an Emerging Therapeutic Target in Cancer." *Front*  
929 *Oncol* 9:635. doi: 10.3389/fonc.2019.00635.
- 930 Morchikh, M., A. Cribier, R. Raffel, S. Amraoui, J. Cau, D. Severac, E. Dubois, O. Schwartz, Y. Bennasser,  
931 and M. Benkirane. 2017. "HEXIM1 and NEAT1 Long Non-coding RNA Form a Multi-subunit  
932 Complex that Regulates DNA-Mediated Innate Immune Response." *Mol Cell* 67 (3):387-399 e5.  
933 doi: 10.1016/j.molcel.2017.06.020.
- 934 Neal, J. A., V. Dang, P. Douglas, M. S. Wold, S. P. Lees-Miller, and K. Meek. 2011. "Inhibition of  
935 homologous recombination by DNA-dependent protein kinase requires kinase activity, is  
936 titratable, and is modulated by autophosphorylation." *Mol Cell Biol* 31 (8):1719-33. doi:  
937 10.1128/MCB.01298-10.
- 938 Neal, J. A., and K. Meek. 2011. "Choosing the right path: does DNA-PK help make the decision?" *Mutat*  
939 *Res* 711 (1-2):73-86. doi: 10.1016/j.mrfmmm.2011.02.010.
- 940 Ochi, T., A. N. Blackford, J. Coates, S. Jhujh, S. Mehmood, N. Tamura, J. Travers, Q. Wu, V. M. Draviam, C.  
941 V. Robinson, T. L. Blundell, and S. P. Jackson. 2015. "DNA repair. PAXX, a paralog of XRCC4 and  
942 XLF, interacts with Ku to promote DNA double-strand break repair." *Science* 347 (6218):185-188.  
943 doi: 10.1126/science.1261971.
- 944 Oliveira, D. V., A. Kato, K. Nakamura, T. Ikura, M. Okada, J. Kobayashi, H. Yanagihara, Y. Saito, H. Tauchi,  
945 and K. Komatsu. 2014. "Histone chaperone FACT regulates homologous recombination by  
946 chromatin remodeling through interaction with RNF20." *J Cell Sci* 127 (Pt 4):763-72. doi:  
947 10.1242/jcs.135855.
- 948 Oza, P., S. L. Jaspersen, A. Miele, J. Dekker, and C. L. Peterson. 2009. "Mechanisms that regulate  
949 localization of a DNA double-strand break to the nuclear periphery." *Genes Dev* 23 (8):912-27.  
950 doi: 10.1101/gad.1782209.
- 951 Pankotai, T., C. Bonhomme, D. Chen, and E. Soutoglou. 2012. "DNAPKcs-dependent arrest of RNA  
952 polymerase II transcription in the presence of DNA breaks." *Nat Struct Mol Biol* 19 (3):276-82.  
953 doi: 10.1038/nsmb.2224.
- 954 Parkes, E. E., S. M. Walker, L. E. Taggart, N. McCabe, L. A. Knight, R. Wilkinson, K. D. McCloskey, N. E.  
955 Buckley, K. I. Savage, M. Salto-Tellez, S. McQuaid, M. T. Harte, P. B. Mullan, D. P. Harkin, and R.  
956 D. Kennedy. 2017. "Activation of STING-Dependent Innate Immune Signaling By S-Phase-Specific  
957 DNA Damage in Breast Cancer." *J Natl Cancer Inst* 109 (1). doi: 10.1093/jnci/djw199.
- 958 Potts, P. R., M. H. Porteus, and H. Yu. 2006. "Human SMC5/6 complex promotes sister chromatid  
959 homologous recombination by recruiting the SMC1/3 cohesin complex to double-strand breaks."  
960 *EMBO J* 25 (14):3377-88. doi: 10.1038/sj.emboj.7601218.
- 961 Rivera Vargas, T., I. Benoit-Lizon, and L. Apetoh. 2017. "Rationale for stimulator of interferon genes-  
962 targeted cancer immunotherapy." *Eur J Cancer* 75:86-97. doi: 10.1016/j.ejca.2016.12.028.
- 963 Ryu, T., B. Spatola, L. Delabaere, K. Bowlin, H. Hopp, R. Kunitake, G. H. Karpen, and I. Chiolo. 2015.  
964 "Heterochromatic breaks move to the nuclear periphery to continue recombinational repair."  
965 *Nat Cell Biol* 17 (11):1401-11. doi: 10.1038/ncb3258.
- 966 Saitoh, T., N. Fujita, T. Hayashi, K. Takahara, T. Satoh, H. Lee, K. Matsunaga, S. Kageyama, H. Omori, T.  
967 Noda, N. Yamamoto, T. Kawai, K. Ishii, O. Takeuchi, T. Yoshimori, and S. Akira. 2009. "Atg9a  
968 controls dsDNA-driven dynamic translocation of STING and the innate immune response." *Proc*  
969 *Natl Acad Sci U S A* 106 (49):20842-6. doi: 10.1073/pnas.0911267106.
- 970 Sawasdichai, A., H. T. Chen, N. Abdul Hamid, P. S. Jayaraman, and K. Gaston. 2010. "In situ subcellular  
971 fractionation of adherent and non-adherent mammalian cells." *J Vis Exp* (41). doi:  
972 10.3791/1958.

- 973 Schirmer, E. C., L. Florens, T. Guan, J. R. Yates, 3rd, and L. Gerace. 2003. "Nuclear membrane proteins  
974 with potential disease links found by subtractive proteomics." *Science* 301 (5638):1380-2. doi:  
975 10.1126/science.1088176.
- 976 Schultz, L. B., N. H. Chehab, A. Malikzay, and T. D. Halazonetis. 2000. "p53 binding protein 1 (53BP1) is an  
977 early participant in the cellular response to DNA double-strand breaks." *J Cell Biol* 151 (7):1381-  
978 90.
- 979 Shang, G., C. Zhang, Z. J. Chen, X. C. Bai, and X. Zhang. 2019. "Cryo-EM structures of STING reveal its  
980 mechanism of activation by cyclic GMP-AMP." *Nature*. doi: 10.1038/s41586-019-0998-5.
- 981 Shao, Z., R. A. Flynn, J. L. Crowe, Y. Zhu, J. Liang, W. Jiang, F. Aryan, P. Aoude, C. R. Bertozzi, V. M. Estes,  
982 B. J. Lee, G. Bhagat, S. Zha, and E. Calo. 2020. "DNA-PKcs has KU-dependent function in rRNA  
983 processing and haematopoiesis." *Nature* 579 (7798):291-296. doi: 10.1038/s41586-020-2041-2.
- 984 Shin, Y. J., M. S. Kim, M. S. Kim, J. Lee, M. Kang, and J. H. Jeong. 2013. "High-mobility group box 2  
985 (HMGB2) modulates radioresponse and is downregulated by p53 in colorectal cancer cell."  
986 *Cancer Biol Ther* 14 (3):213-21. doi: 10.4161/cbt.23292.
- 987 Smeenk, G., W. W. Wiegant, J. A. Marteiijn, M. S. Luijsterburg, N. Sroczynski, T. Costelloe, R. J. Romeijn, A.  
988 Pastink, N. Mailand, W. Vermeulen, and H. van Attikum. 2013. "Poly(ADP-ribosyl)ation links the  
989 chromatin remodeler SMARCA5/SNF2H to RNF168-dependent DNA damage signaling." *J Cell Sci*  
990 126 (Pt 4):889-903. doi: 10.1242/jcs.109413.
- 991 Sui, H., M. Zhou, H. Imamichi, X. Jiao, B. T. Sherman, H. C. Lane, and T. Imamichi. 2017. "STING is an  
992 essential mediator of the Ku70-mediated production of IFN-lambda1 in response to exogenous  
993 DNA." *Sci Signal* 10 (488). doi: 10.1126/scisignal.aah5054.
- 994 Sullivan, T., D. Escalante-Alcalde, H. Bhatt, M. Anver, N. Bhat, K. Nagashima, C. L. Stewart, and B. Burke.  
995 1999. "Loss of A-type lamin expression compromises nuclear envelope integrity leading to  
996 muscular dystrophy." *J Cell Biol* 147 (5):913-20. doi: 10.1083/jcb.147.5.913.
- 997 Vanpouille-Box, C., A. Alard, M. J. Aryankalayil, Y. Sarfraz, J. M. Diamond, R. J. Schneider, G. Inghirami, C.  
998 N. Coleman, S. C. Formenti, and S. Demaria. 2017. "DNA exonuclease Trex1 regulates  
999 radiotherapy-induced tumour immunogenicity." *Nat Commun* 8:15618. doi:  
1000 10.1038/ncomms15618.
- 1001 Wang, H., S. Hu, X. Chen, H. Shi, C. Chen, L. Sun, and Z. J. Chen. 2017. "cGAS is essential for the antitumor  
1002 effect of immune checkpoint blockade." *Proc Natl Acad Sci U S A* 114 (7):1637-1642. doi:  
1003 10.1073/pnas.1621363114.
- 1004 Wu, W., F. Lin, and H. J. Worman. 2002. "Intracellular trafficking of MAN1, an integral protein of the  
1005 nuclear envelope inner membrane." *J Cell Sci* 115 (Pt 7):1361-71.
- 1006 Zhou, B. B., and S. J. Elledge. 2000. "The DNA damage response: putting checkpoints in perspective."  
1007 *Nature* 408 (6811):433-9. doi: 10.1038/35044005.

1008
